# Supplementary material for: Cytotoxic CD8+ T cells promote granzyme B-dependent adverse post-ischemic cardiac remodeling
Source: PubMed Central journal article supplement (PMC7935973; doi:10.1038/s41467-021-21737-9), 2021-03-05
Supplement: 41467_2021_21737_MOESM1_ESM.pdf [file 41467_2021_21737_MOESM1_ESM.pdf]

## Supplementary information

### **Cytotoxic CD8+ T cells promote granzyme B-dependent adverse post-ischemic cardiac remodeling**

Icia Santos-Zas, Jeremie Lemarié, Ivana Zlatanova, Marine Cachanado, Jean-Christophe Seghezzi, Hakim Benamer, Pascal Goube, Marie Vandestienne, Raphael Cohen, Maya Ezzo, Vincent Duval, Yujiao Zhan<sup>g</sup>, Jin-Bo Su, Alain Bizé, Lucien Sambin, Philippe Bonnin, Maxime Branchereau, Christophe Heymes, Corinne Tanchot, José Vilar, Clement Delacroix, Jean-Sebastien Hulot, Clement Cochain, Patrick Bruneval, Nicolas Danchin, Alain Tedgui, Ziad Mallat, Tabassome Simon, Bijan Ghaleh, Jean-Sébastien Silvestre, Hafid Ait-Oufella

Supplementary Figures 1-38

Supplementary Tables 1-6

Supplementary Fig. 1

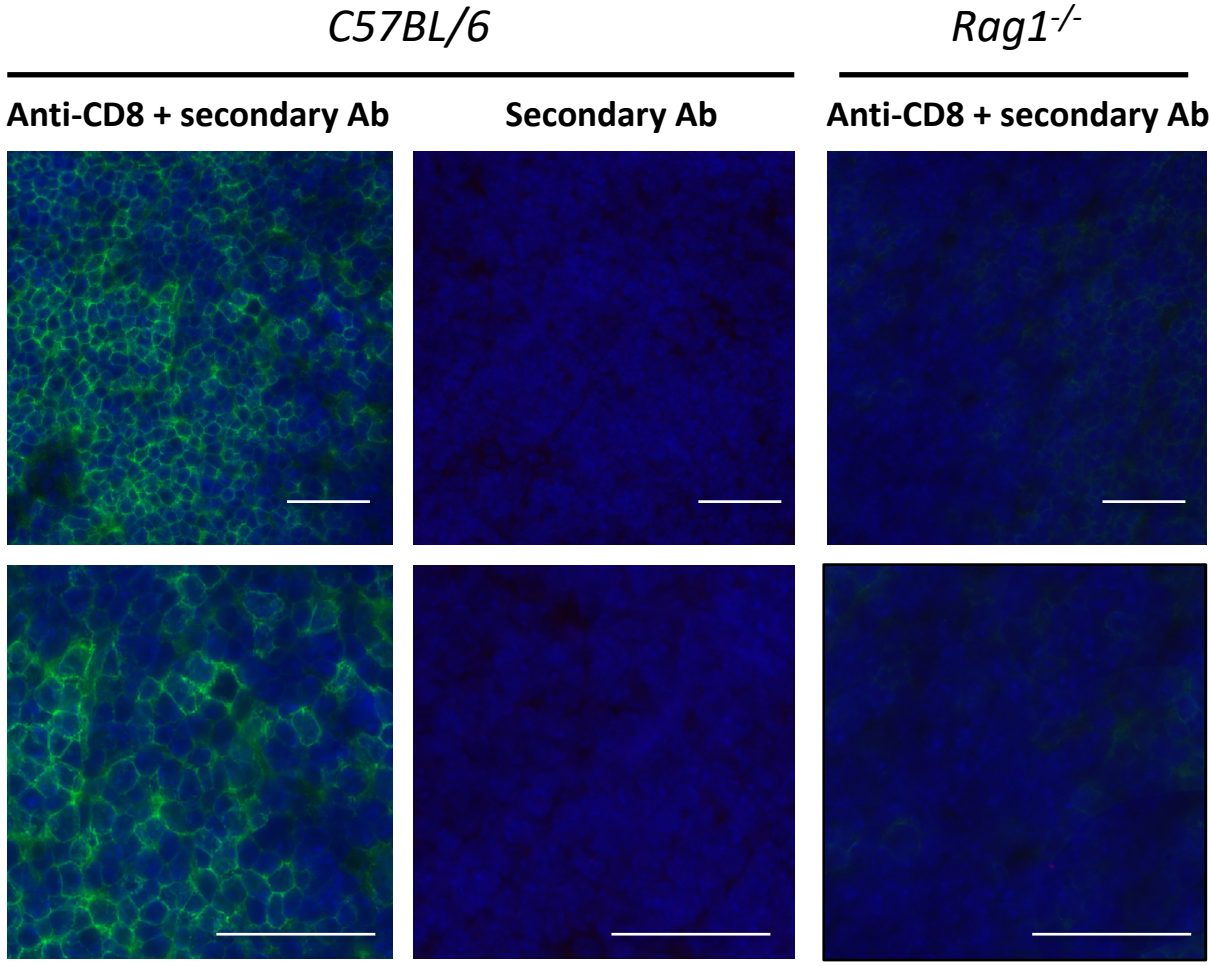

**Supplementary Fig.1. Validation of anti-CD8 monoclonal antibody for immunostaining.** CD8 staining was detected on spleen section of *C57BL/6* mouse but not on spleen section of lymphocyte-deficient *Rag1<sup>-/-</sup>* mouse. Bar scale 40μm.

## Supplementary Fig. 2

Isotype Control

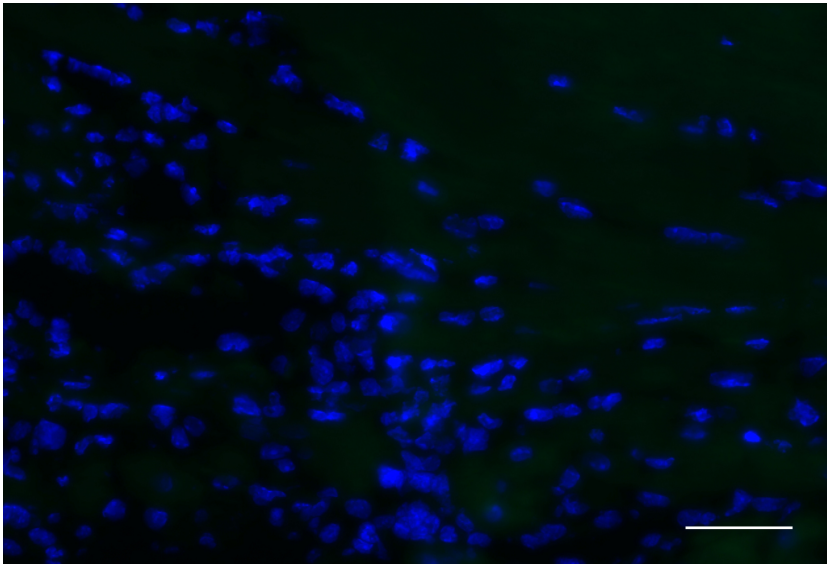

Anti-CD8

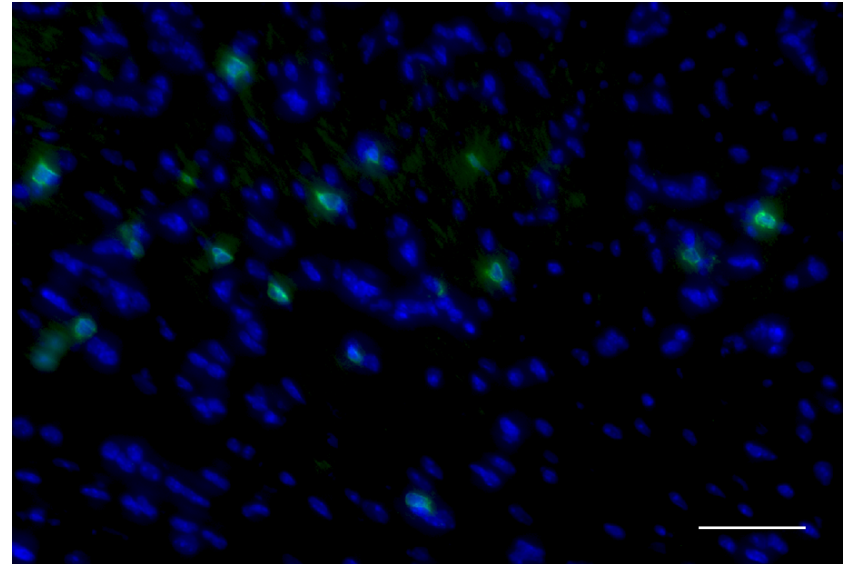

**Supplementary Fig.2. Validation of anti-CD8 monoclonal antibody for immunostaining.** At day 3 after MI, ischemic heart tissue sections were stained either with rat anti-mouse IgG2b isotype or with anti-CD8 monoclonal antibody. No staining was detected after isotype staining whereas CD8+ cells (Green) were detected using CD8 mAb. Scale bar 50  $\mu\text{m}$ .

## Supplementary Fig. 3

CTR

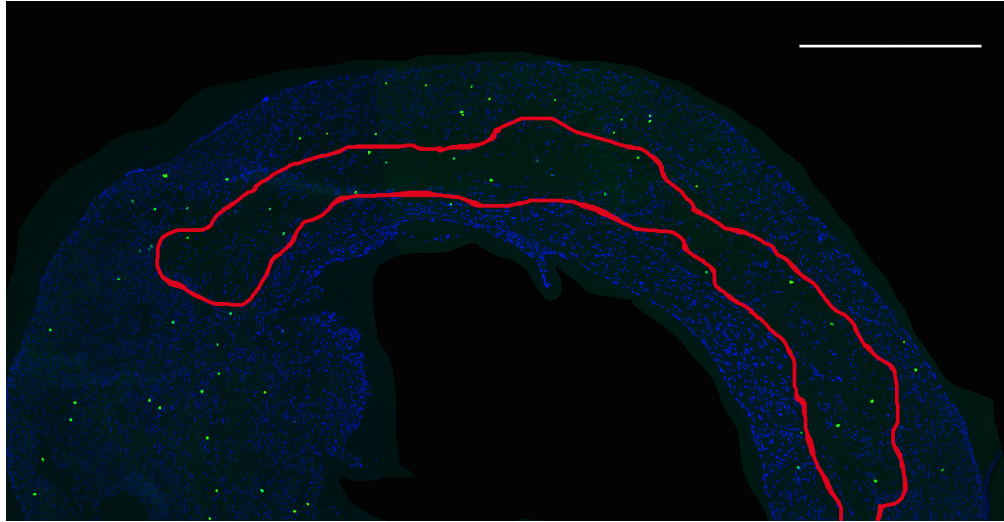

CD8 Depleted

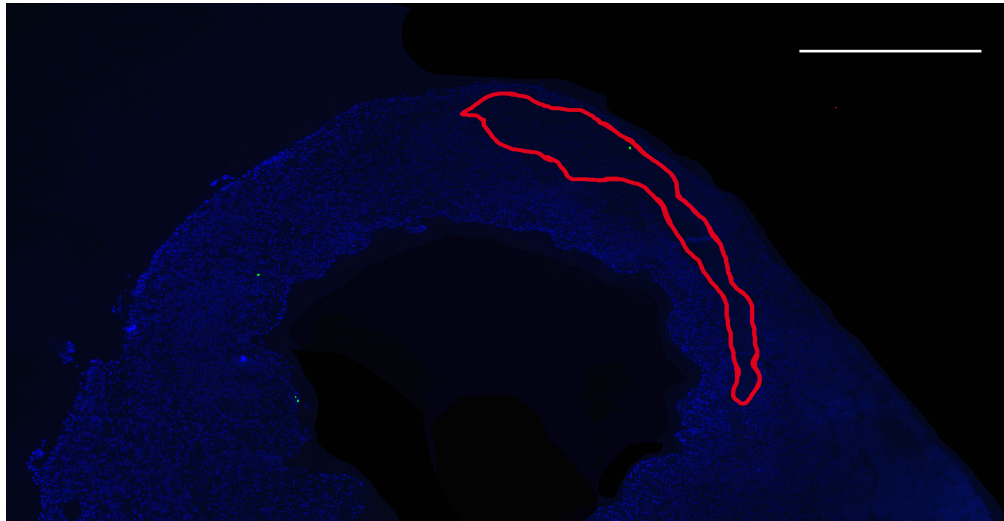

**Supplementary Fig.3. Following MI, CD8<sup>+</sup> T cells infiltration was detected in both infarct and peri-infarct areas.** Upper panel, immunostaining in the ischemic myocardium at day 3 after MI showing CD8<sup>+</sup> T infiltration (Green). Lower panel, CD8 immunostaining at day 3 after MI in CD8-depleted mice. Scale bar 500  $\mu$ m.

# Supplementary Fig. 4

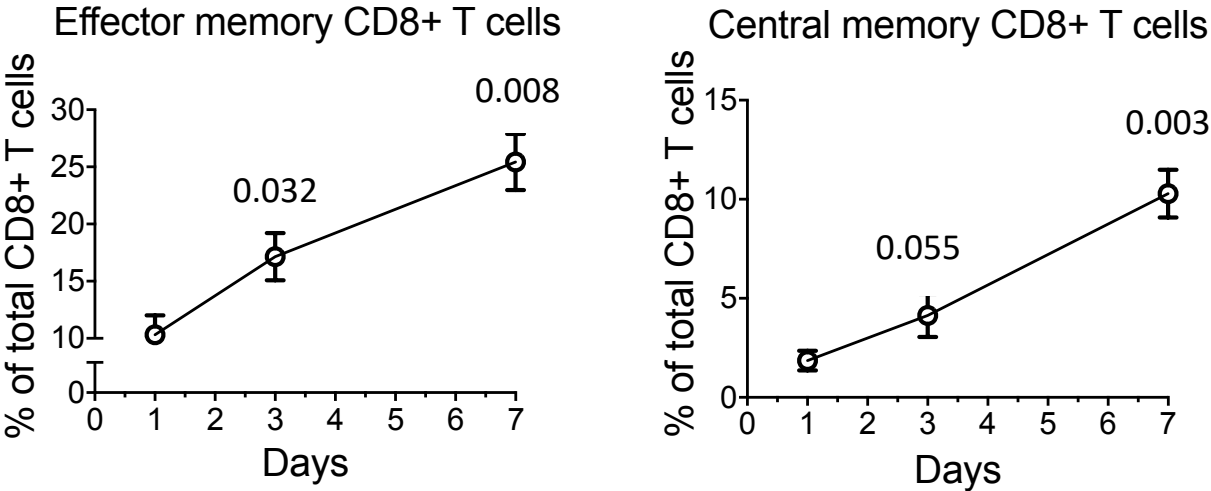

**Supplementary Fig.4. Myocardial infarction induces time-dependent recruitment of effector and central memory CD8+ T cells.** Proportion of CD44<sup>+</sup>CCR7<sup>high</sup> central memory and CD44<sup>+</sup>CCR7<sup>low</sup> effector memory CD8<sup>+</sup> T cells in the ischemic heart at day 1 (n=6), 3 (n=7) and 7 (n=8) after MI. mean values  $\pm$  SEM are represented. P values were calculated using two-tailed Kruskal-Wallis test.

# Supplementary Fig. 5

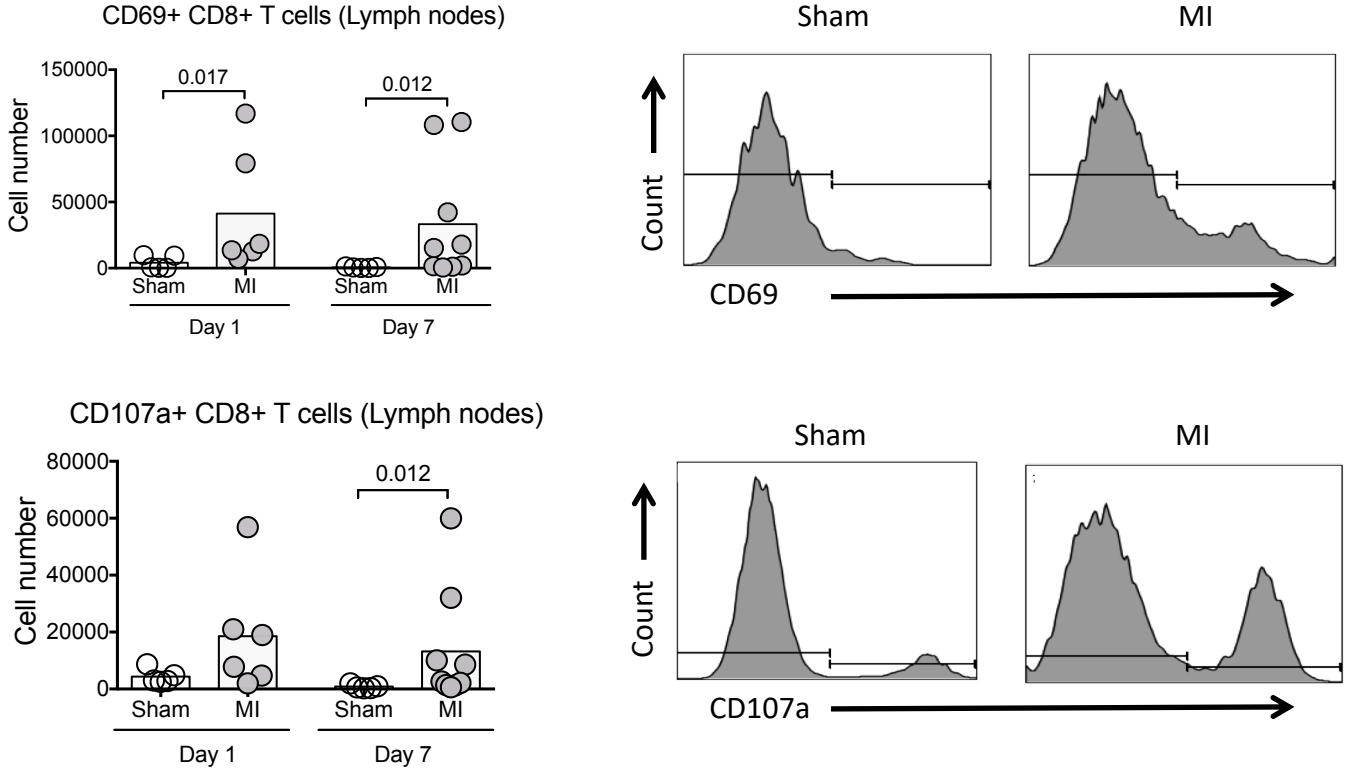

**Supplementary Fig.5. Myocardial infarction induces time-dependent activation of CD8+ T cells in mediastinal lymph nodes.** (a) Representative examples and quantitative analysis of CD8+ T cell expressing CD69 in mediastinal lymph nodes in MI (Grey, n=6/9 at day 1/7) and Sham operated (White, n=6/timepoint) mice. Representative example and quantitative analysis of CD8+ T cell expressing CD107a in mediastinal lymph nodes (n=6-8 mice per group/time point). P values were calculated using two-tailed Mann-Whitney test at each time point.

## Supplementary Fig. 6

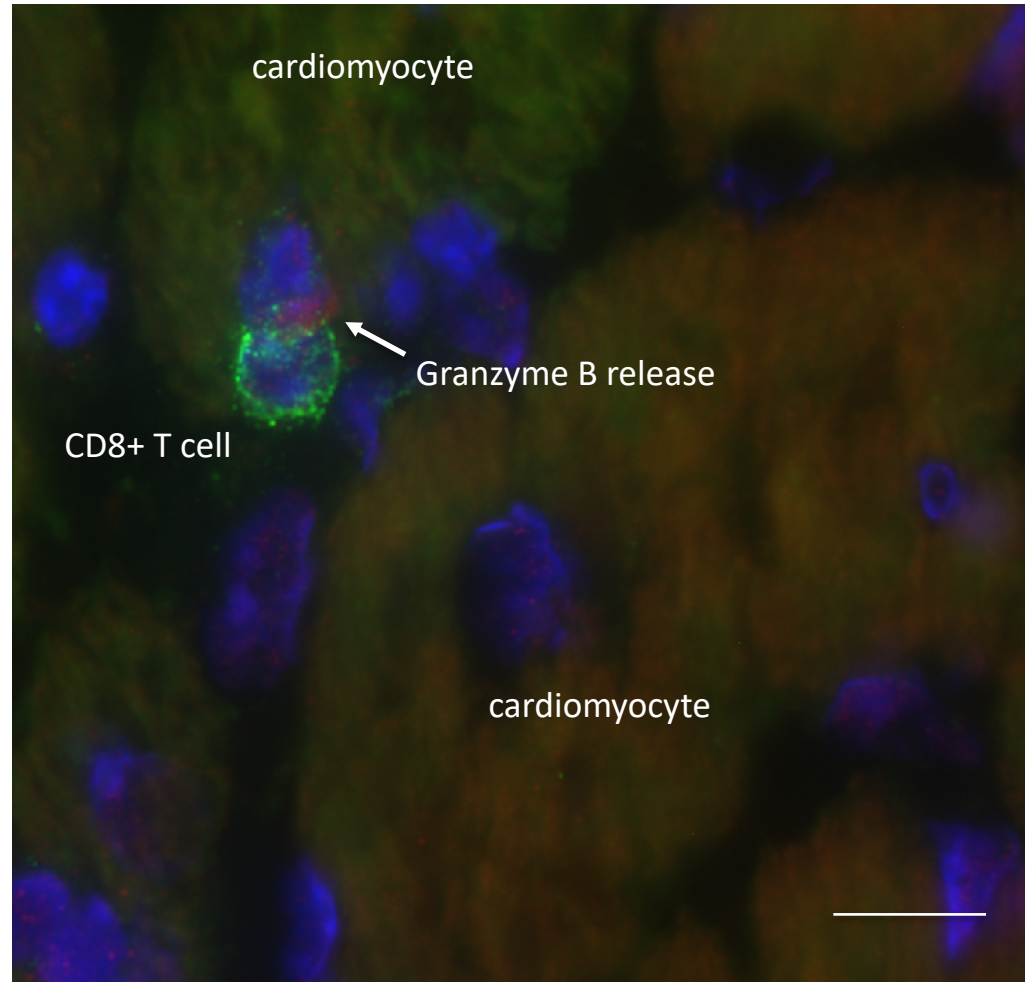

**Supplementary Fig.6. CD8<sup>+</sup> T cells release Granzyme B in peri infarct area.** Immunostaining in the ischemic myocardium at day 3 after MI showing CD8<sup>+</sup> T cells (Green) and Granzyme B degranulation (Red); Scale bar 20 $\mu$ m.

Supplementary Fig. 7

A

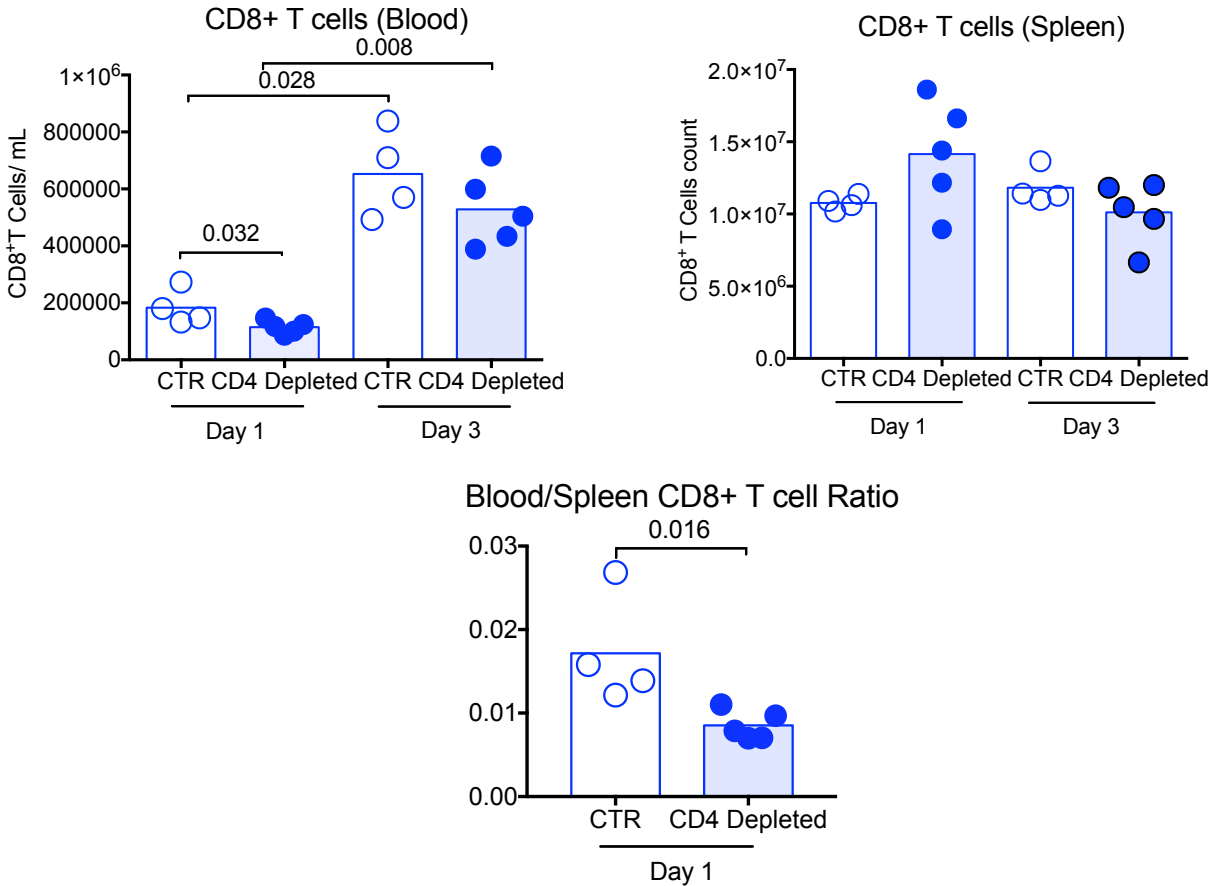

**Supplementary Fig.7. CD4<sup>+</sup> T cells regulate CD8<sup>+</sup> T cell trafficking in the context of acute MI.** *C57Bl/6* Wild-type mice received intraperitoneal injection of anti-CD4 depleting monoclonal antibody (Blue filled)(150 μg/mice) or isotype control (Blue borderline) one day before coronary occlusion and CD8<sup>+</sup> T cells were quantified in the blood (A) and in the spleen (B) at day 1 and day 3 after MI (CTR n=4/time point, CD4 Depleted n=5/time point). To evaluate the impact of CD4 depletion on CD8<sup>+</sup> T cell mobilization from the spleen to the blood, the Blood/Spleen ratio was calculated at day 1 (C). P values were calculated using two-tailed Mann-Whitney test.



# Supplementary Fig. 8

6 hours after antibody injection (Blood)

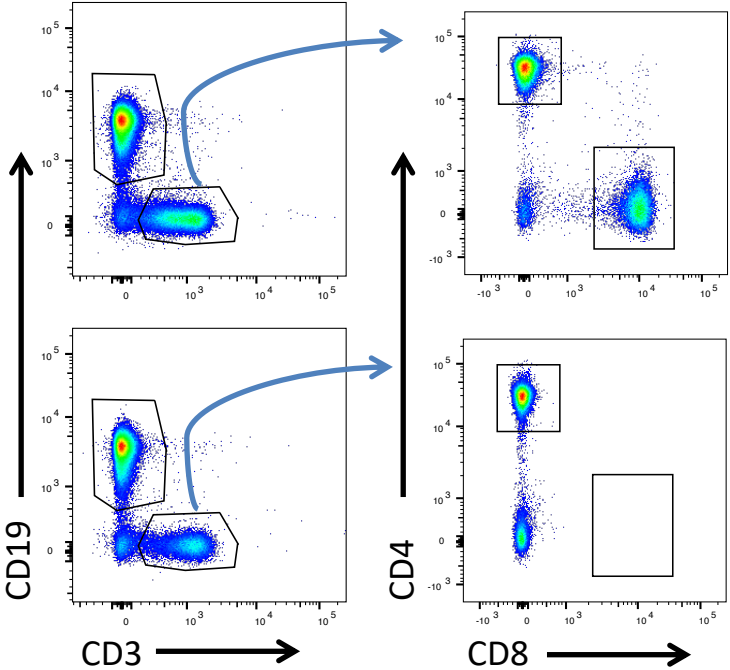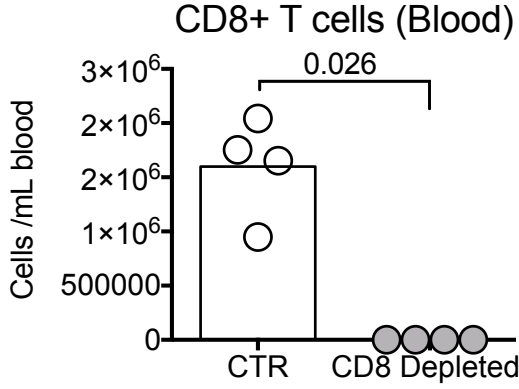

**Supplementary Fig.8. mAb CD8 treatment quickly depletes circulating CD8<sup>+</sup> T cells.** Quantitative analysis of CD8<sup>+</sup> T cell staining in the blood of C57BL/6J mice 6 hours after treatment with isotype control (CTR, white) or the CD8 mAb depleting antibody (CD8 Depleted, Grey) (n=4/Group). P values were calculated using two-tailed Mann-Whitney test.

Supplementary Fig. 9

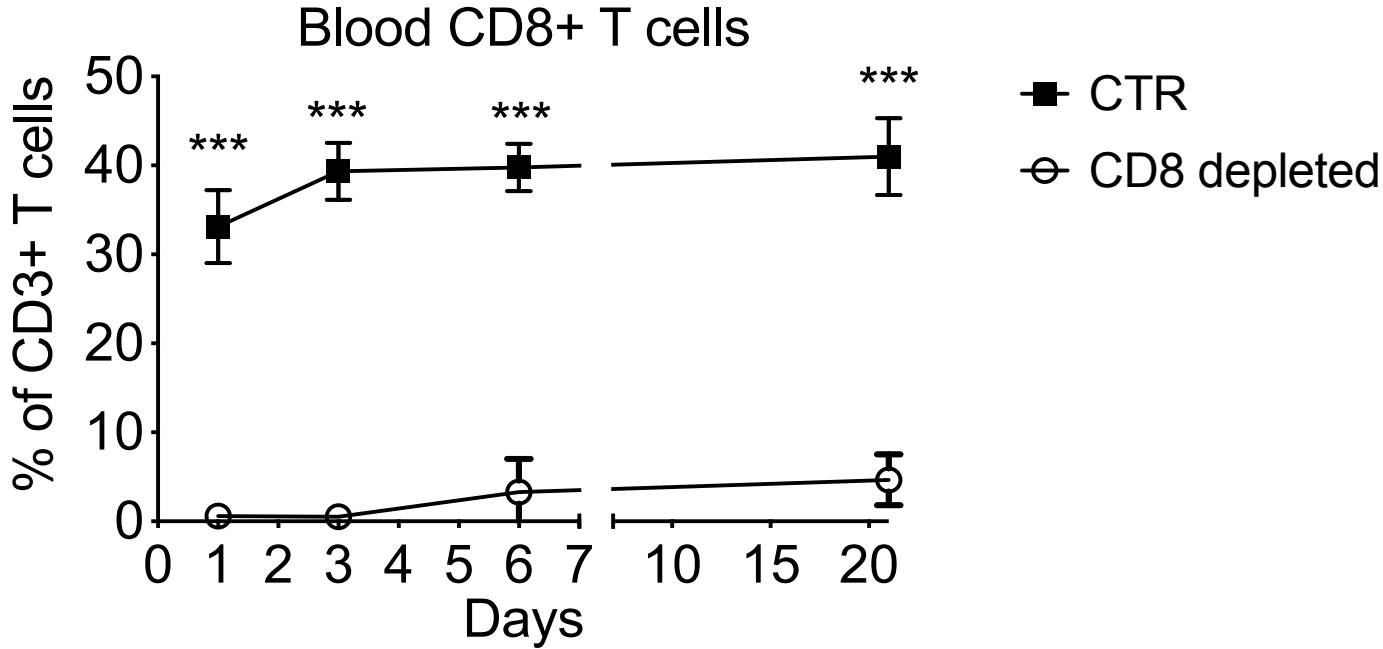

**Supplementary Fig.9. mAb CD8 treatment efficiently depletes circulating CD8<sup>+</sup> T cells.** Quantitative analysis of CD8<sup>+</sup> T cell staining in the blood of C57BL/6J mice treated with isotype control (CTR, Black box) or the CD8 mAb (CD8 Depleted, white circle) until Day 21 (n=6/group/time point); mean values ± SEM are represented, \*\*\* P<0.001. P values were calculated using two-tailed Mann-Whitney test at each time point.

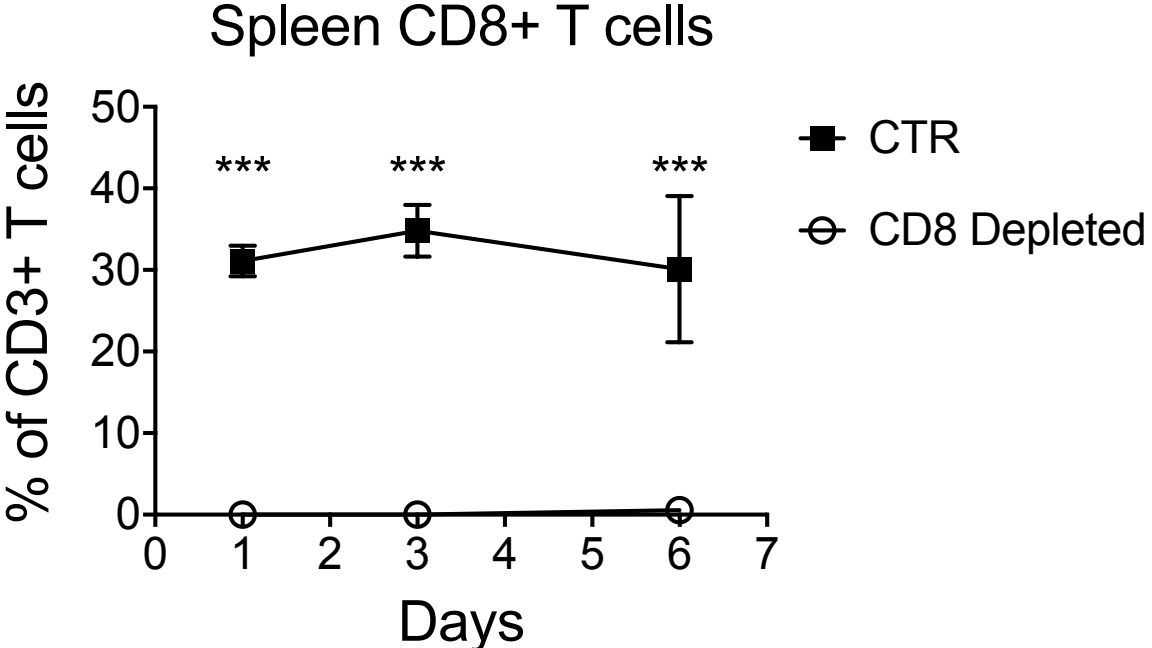

**Supplementary Fig.10. mAb CD8 treatment efficiently depletes spleen CD8+ T cells.** Quantitative analysis (right) of CD8+ T cell staining in the spleen of C57BL/6J mice treated with isotype control (CTR, black box) or with the CD8 mAb (CD8 Depleted, white circle) (n=6/group/time point); mean values  $\pm$  SEM are represented, \*\*\* P<0.001. P values were calculated using two-tailed Mann-Whitney test at each timepoint.

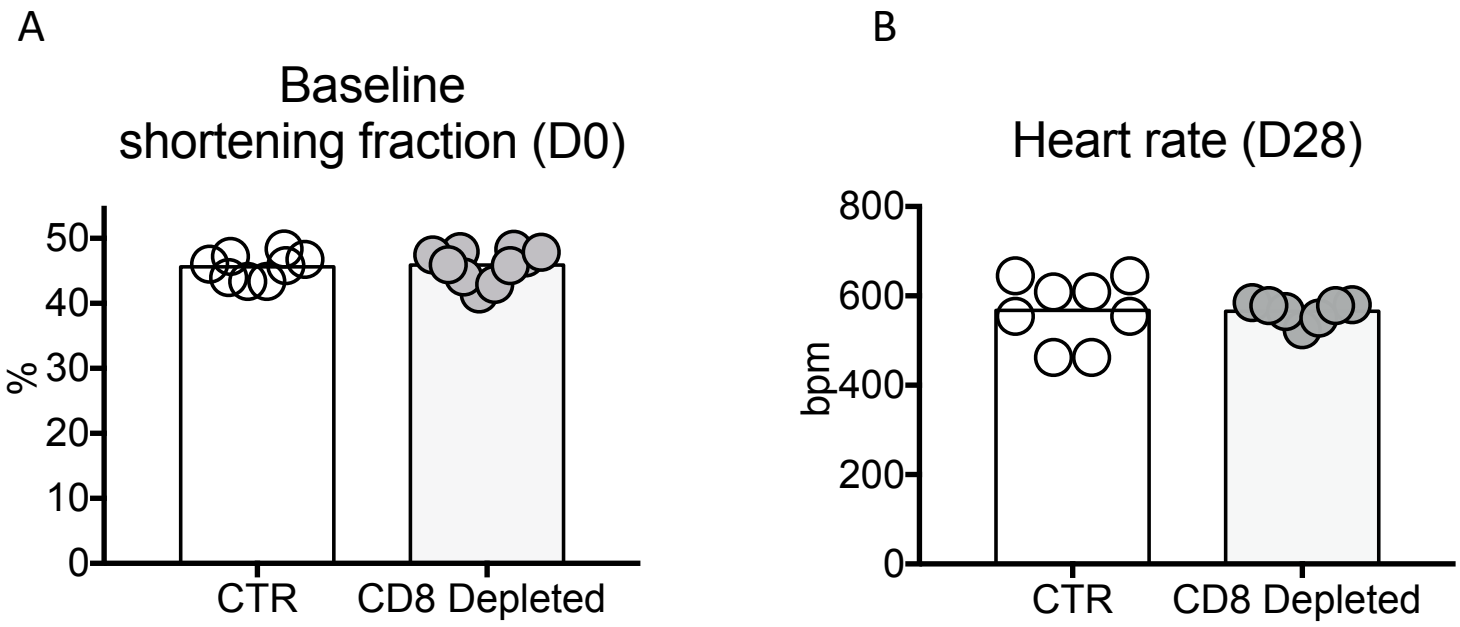

**Supplementary Fig.11. (A) Baseline echocardiography-derived parameters** before isotype (White circle) or CD8 monoclonal antibody treatment (Grey circle) (n=10/group) and **(B) heart rate** at day 21 after MI (CTR n=8, CD8 depleted n=9).

Supplementary Fig. 12

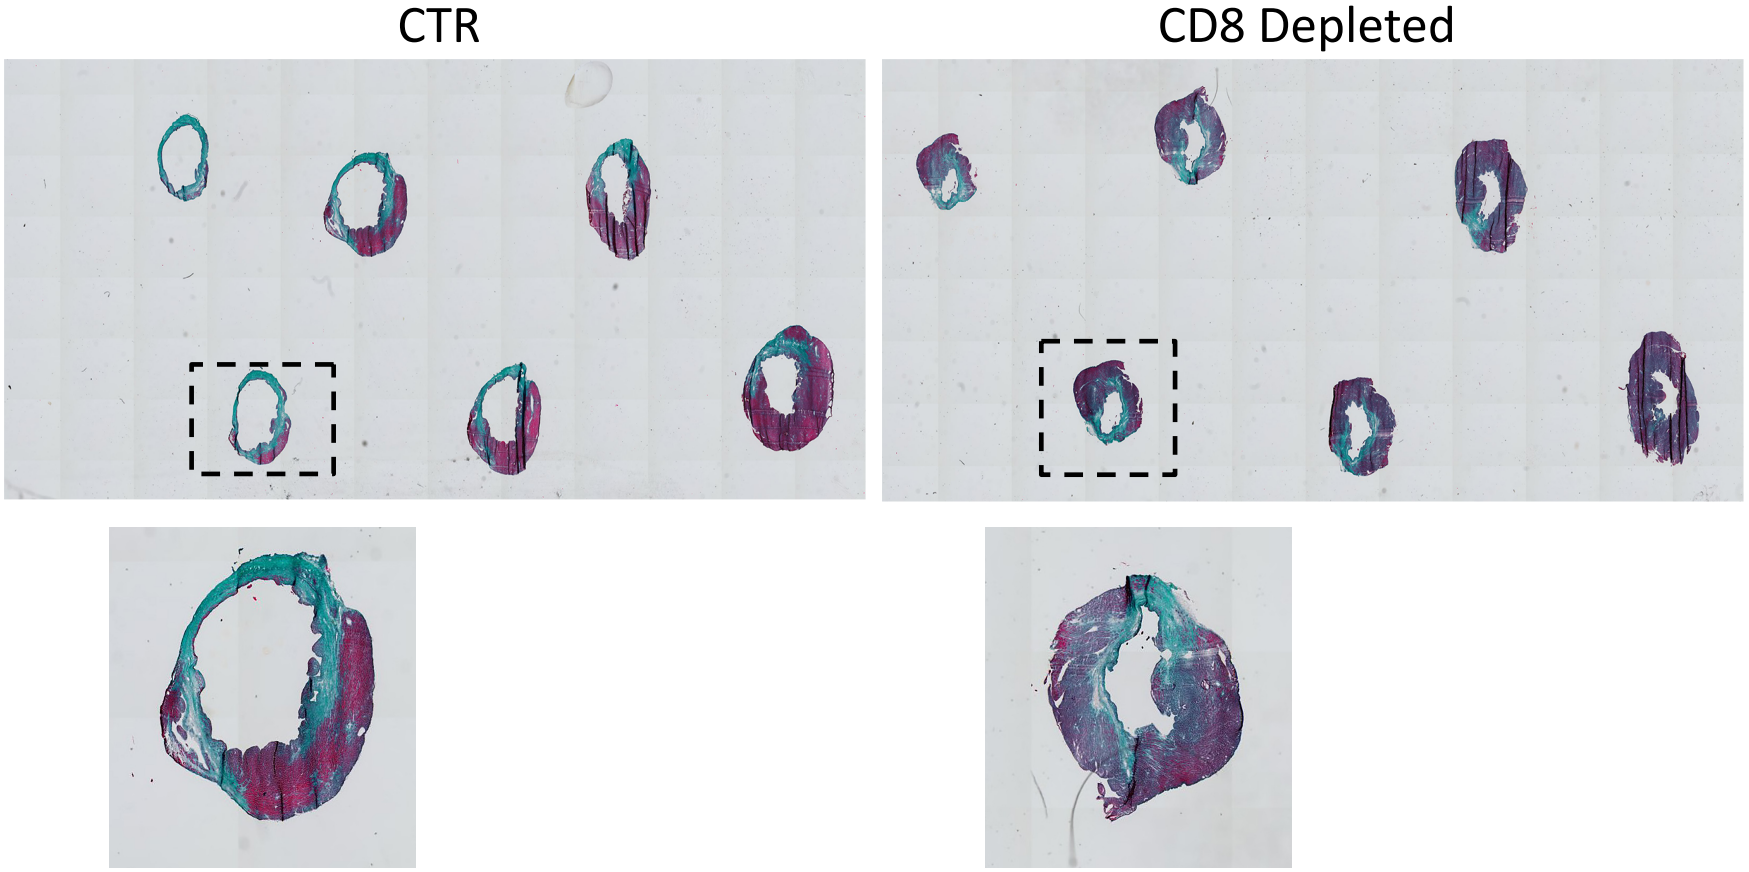

**Supplementary Fig.12. mAb CD8 treatment reduces infarct size at Day 21.** Representative photomicrographs of infarct size evaluation using Masson Trichrome staining on sections from the entire heart of isotype-treated or anti-CD8 depleted mice at day 21 after MI.

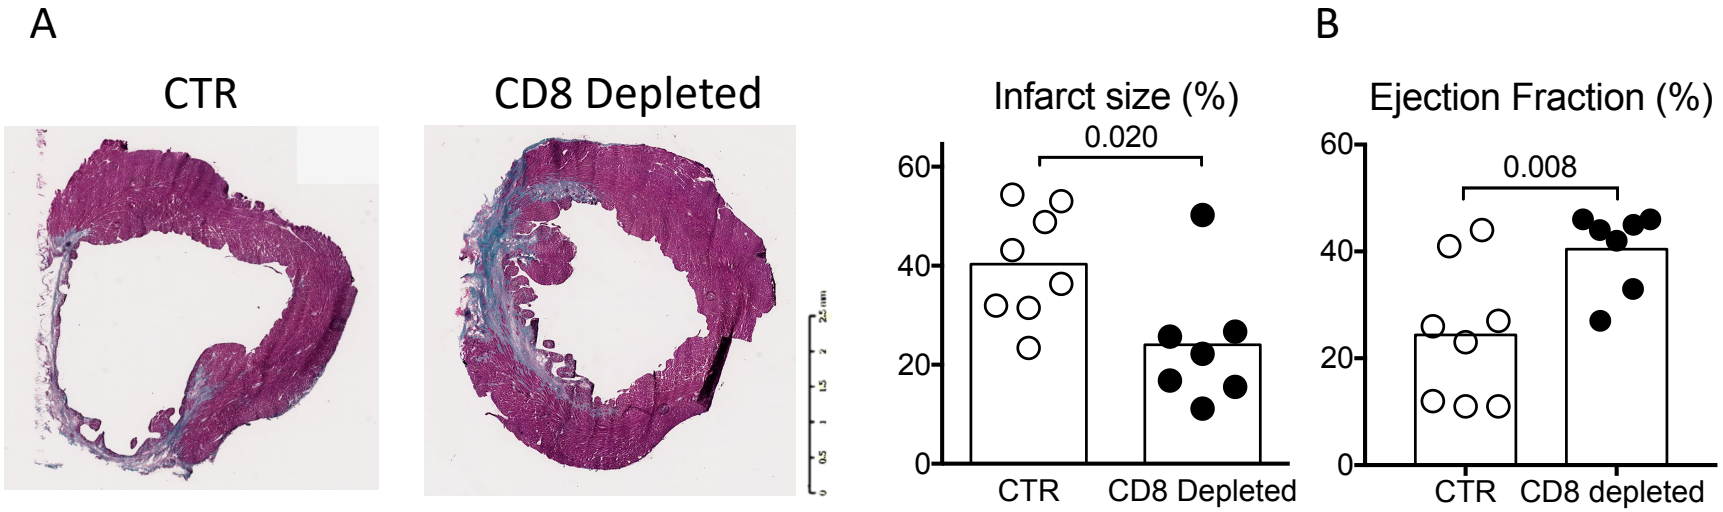

**Supplementary Fig.13. mAb CD8 treatment limits deleterious post-ischemic cardiac remodeling at Day 21 in females C57BL/6 mice.** A, Representative photomicrographs and quantification of infarct size evaluation using Masson Trichrome staining on sections of isotype-treated (White circle) or anti-CD8 depleted (black circle) mice at day 21 after MI. B, Quantification of LV ejection fraction at day 21 by echocardiography, (CTR n=8 and CD8 Depleted n=7). P values were calculated using two-tailed Mann-Whitney test. LV, Left ventricle.

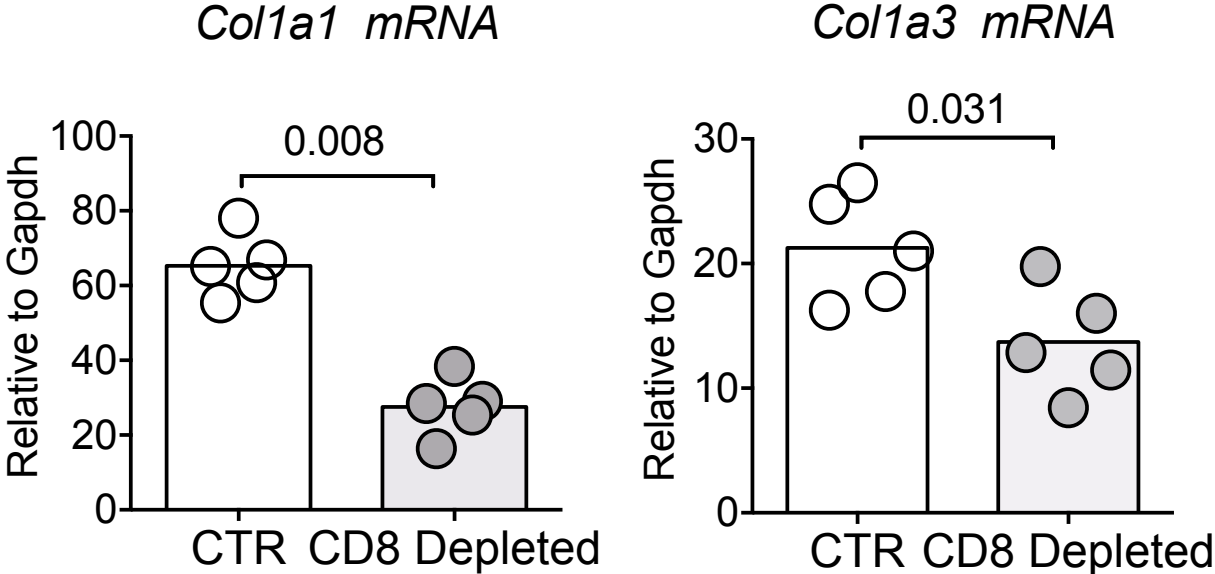

**Supplementary Fig.14. CD8<sup>+</sup> T depletion decreases pro-fibrotic signature in infarcted heart.** Quantitative evaluation of *Col1a1* and *Col1a3* mRNA levels within the ischemic myocardium, on day 7 after MI in CTR (white) and CD8 Depleted (grey) mice (n=5 per group). P values were calculated using two-tailed Mann-Whitney test.

Supplementary Fig. 15

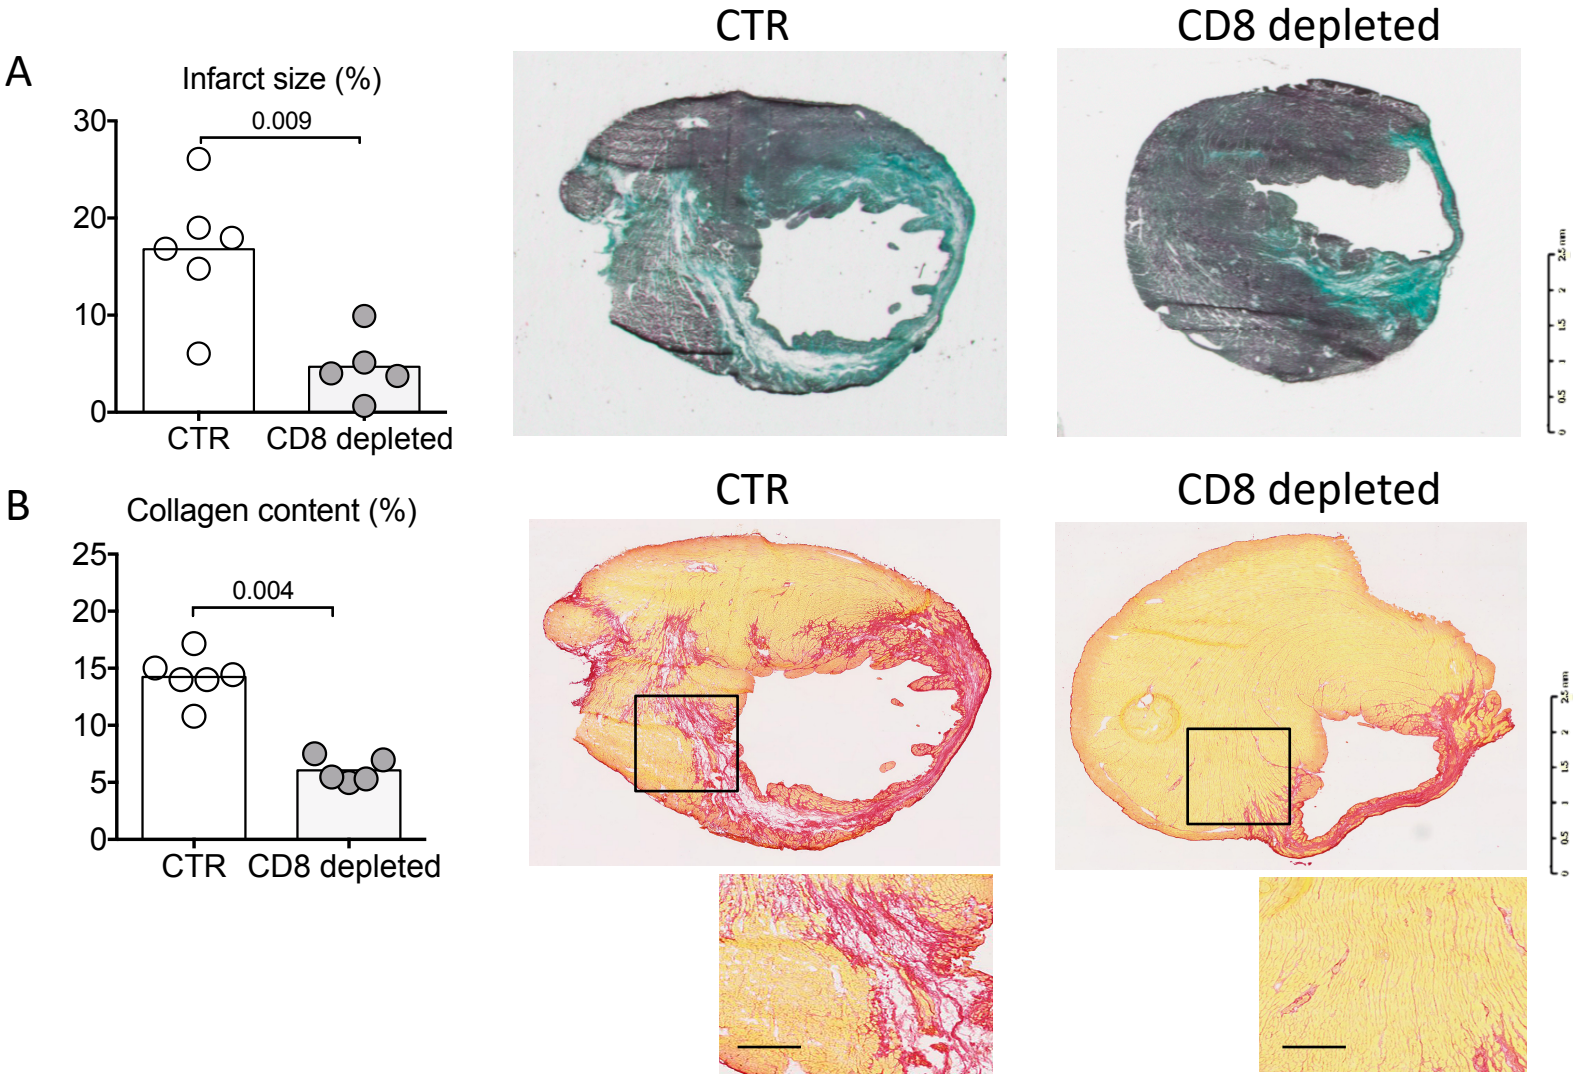

**Supplementary Fig.15. The CD8 T cell depleting antibody improves heart function and reduces infarct size at later stage. (a)** Representative photomicrographs and quantitative analysis of infarct size evaluation using Masson trichrome staining, in the 2 groups of mice at day 56 after MI. (n=6 CTR white and n= 5 CD8 Depleted Grey). **(b)** Representative photomicrographs and quantitative analysis of myocardial fibrosis evaluated by Sirius Red staining, in the 2 groups of mice at day 56 after MI (n=6 CTR white and n= 5 CD8 Depleted Grey). P values were calculated using two-tailed Mann-Whitney test. bar scale 200 um.



# Supplementary Fig. 16

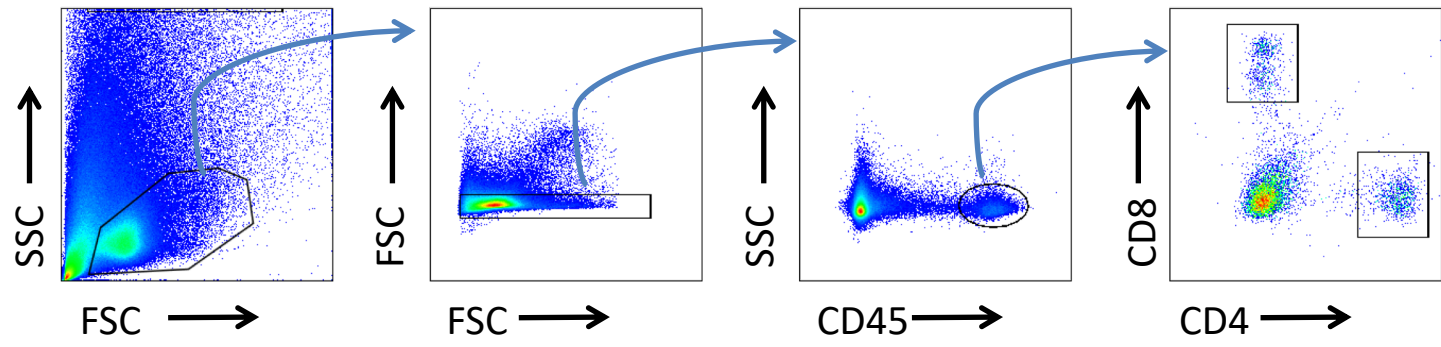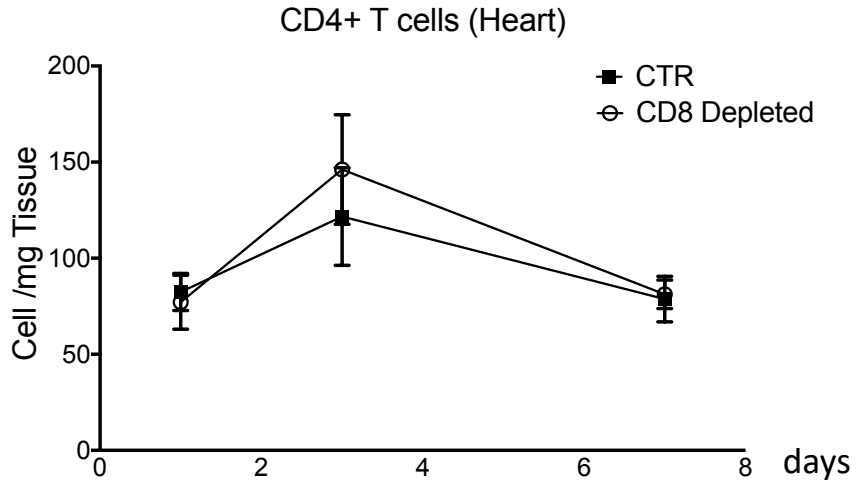

**Supplementary Fig.16. The CD8 T cell depleting antibody had no impact on CD4+ T cell trafficking in infarcted hearts.** Cell suspensions from infarcted hearts of control (Black box) or CD8 depleted (White circle) C57BL/6J mice were stained and analyzed by flow cytometry at different time points after MI. **(a)** CD4+ T lymphocytes were identified as CD45+CD4+ cells. Data are representative of 6 mice per group at each time point. Mean values  $\pm$  SEM are shown.

# Supplementary Fig. 17

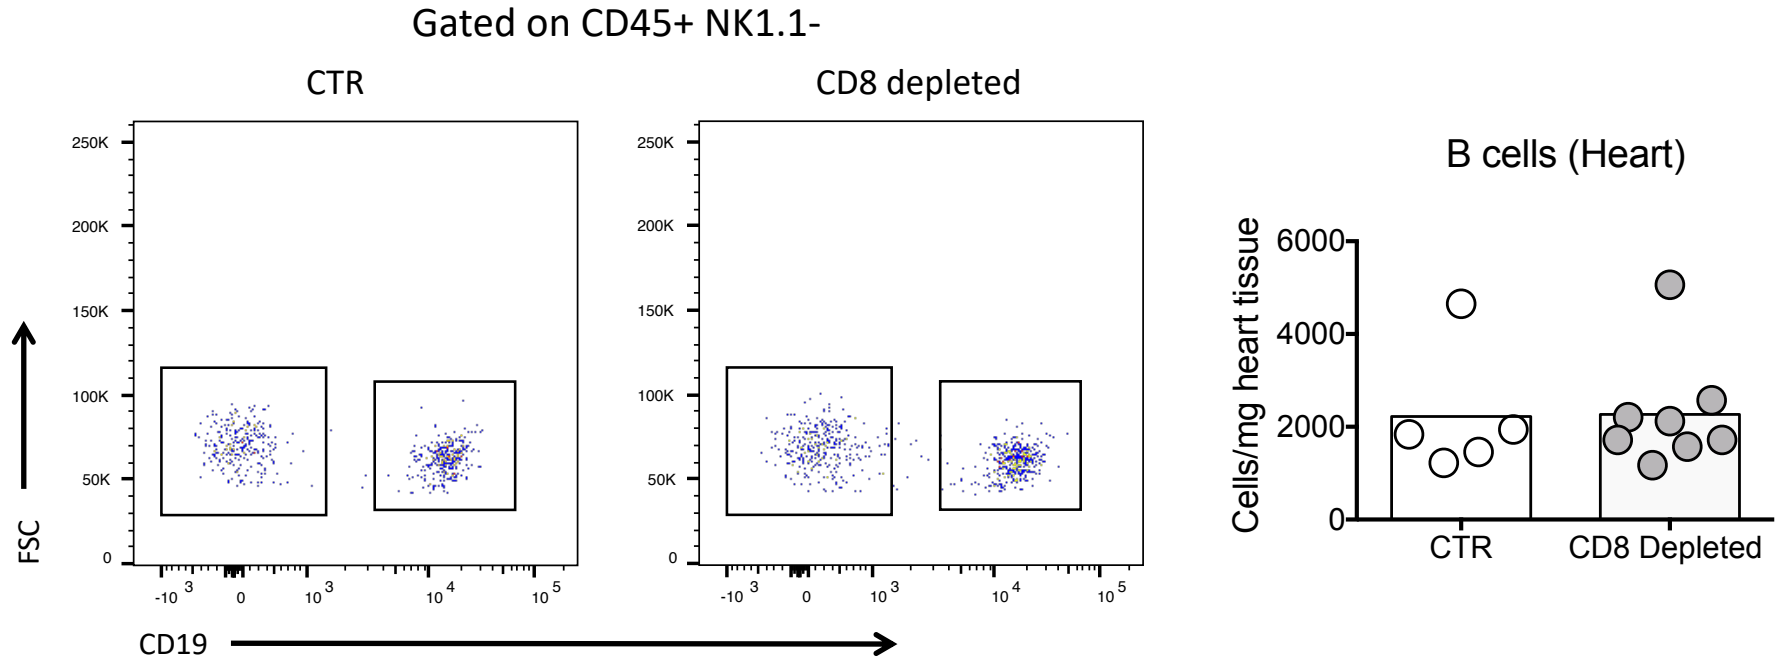

**Supplementary Fig.17. The CD8 T cell depleting antibody had no impact on B cell trafficking in infarcted hearts.** Cell suspensions from infarcted hearts of control (White) or CD8 depleted (Grey) C57BL/6J mice were stained and analyzed by flow cytometry 5 days after MI. **(a)** B lymphocytes were identified as CD45+NK1.1-CD19+ cells. (N=5-8/group).

# Supplementary Fig. 18

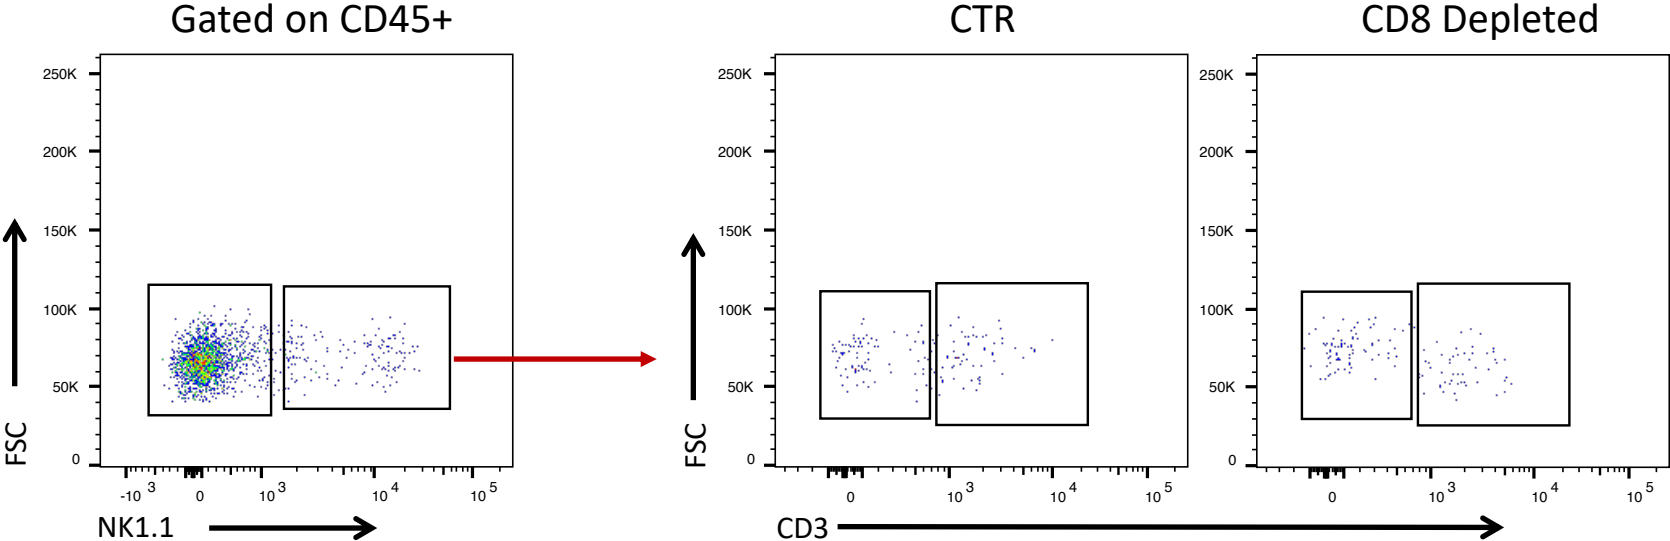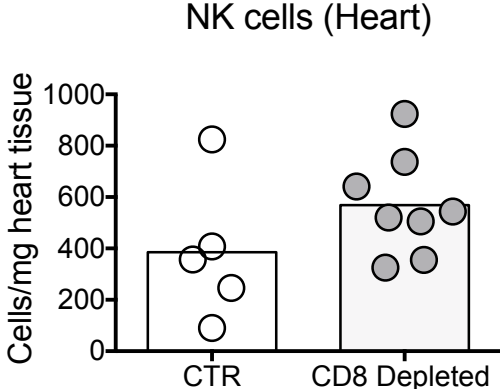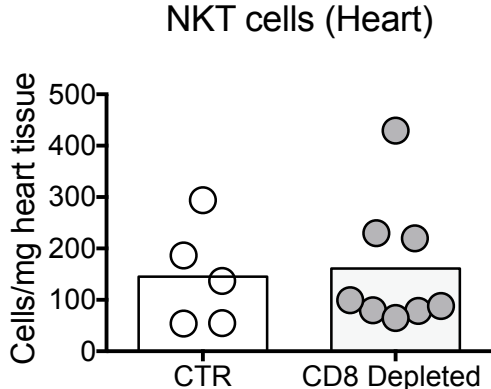

**Supplementary Fig.18. The CD8 T cell depleting antibody had no impact on NK and NKT cell trafficking in infarcted hearts.** Cell suspensions from infarcted hearts of control (White) or CD8 depleted (Grey) C57BL/6J mice were stained and analyzed by flow cytometry 5 days after MI. **(a)** NKT were identified as CD45+NK1.1+CD3+ cells and NK were identified as CD45+NK1.1+CD3- cells. (N=5-8/group).

Supplementary Fig. 19

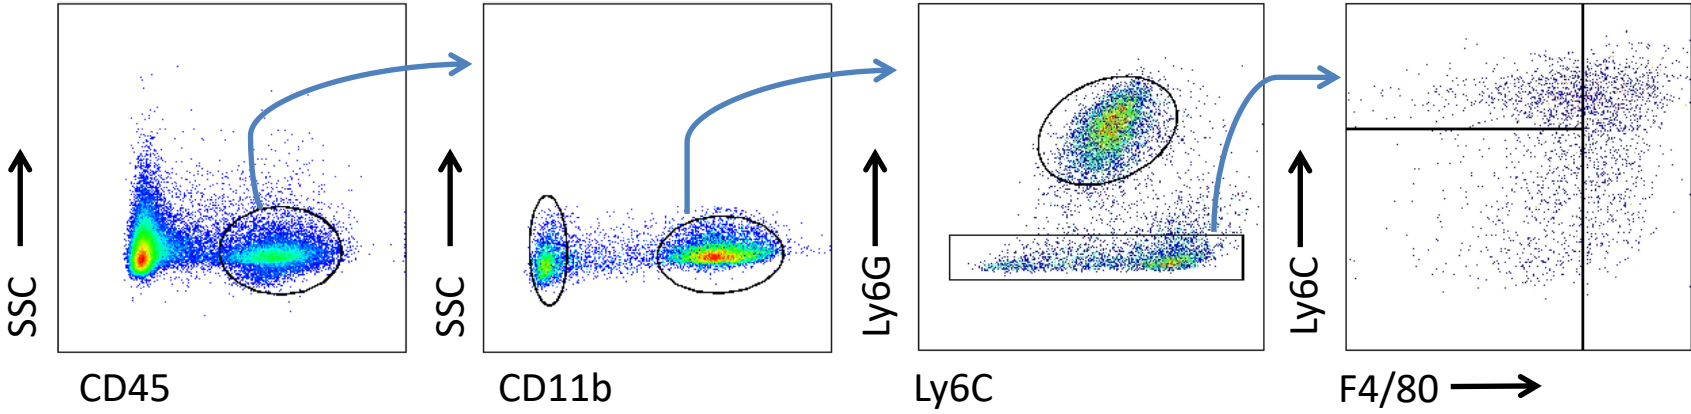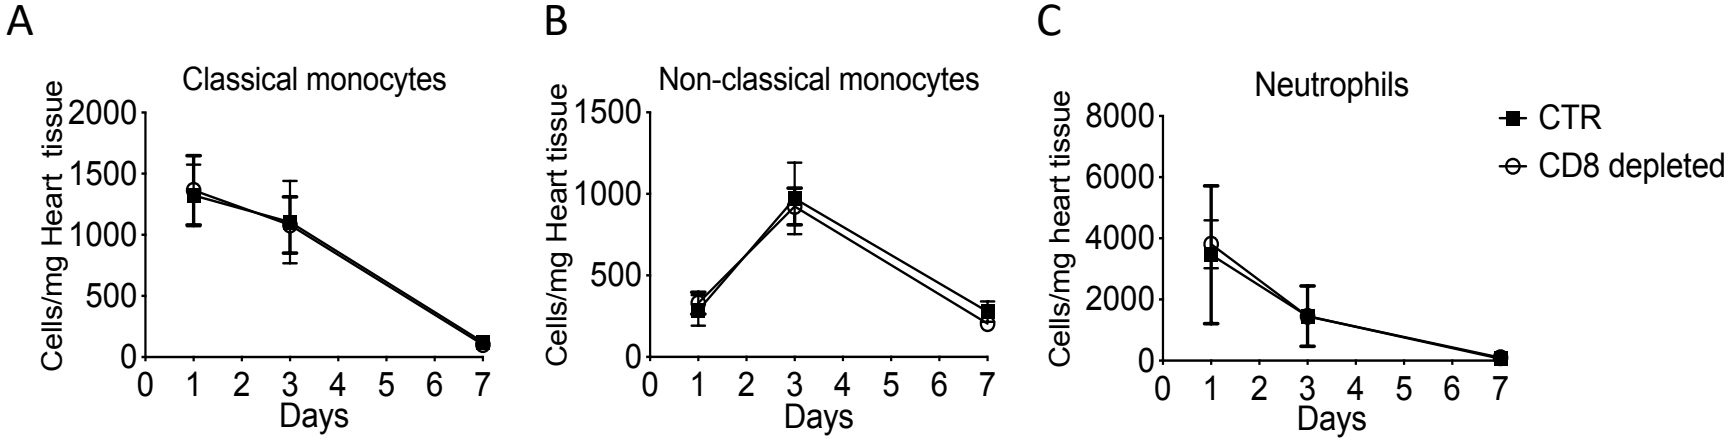

**Supplementary Fig.19. The CD8 T cell depleting antibody had no impact on myeloid cell trafficking in infarcted hearts.** Cell suspensions from infarcted hearts of control (Black box) or CD8 depleted (White circle) C57BL/6J mice were stained and analyzed by flow cytometry at different time points after MI. **(a)** Classical monocytes were identified as CD11b<sup>hi</sup> Ly6G<sup>-</sup> F4/80<sup>-</sup> Ly6C<sup>high</sup>. **(b)** Non-classical monocytes were identified as CD11b<sup>hi</sup> Ly6G<sup>-</sup> F4/80<sup>-</sup> Ly6C<sup>low</sup>. **(c)** Neutrophils were identified as CD11b<sup>+</sup> Ly6G<sup>+</sup> (gated on CD45<sup>+</sup> cells) Data are representative of 6 mice per group at each time point. Mean values ± SEM are shown.

Gated on CD45+ cells

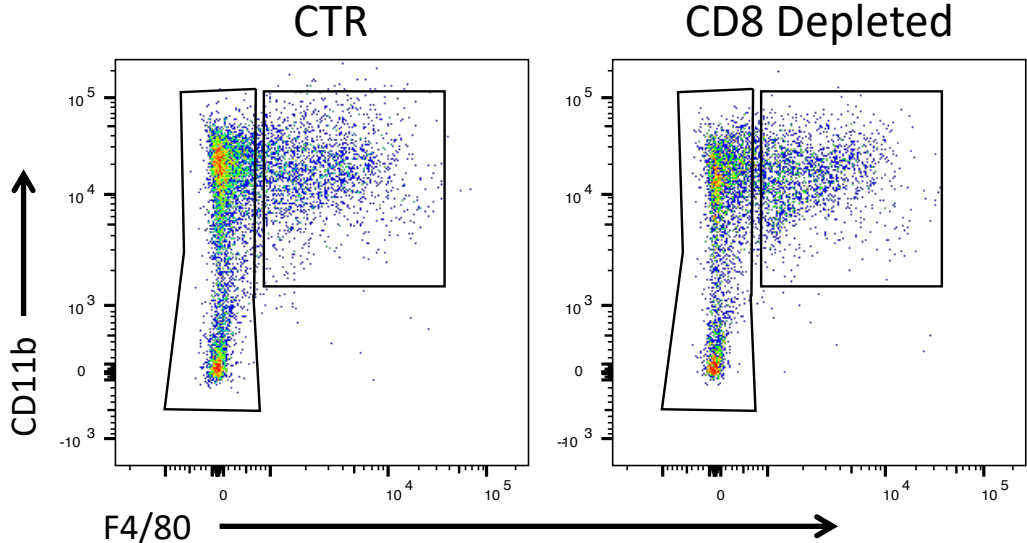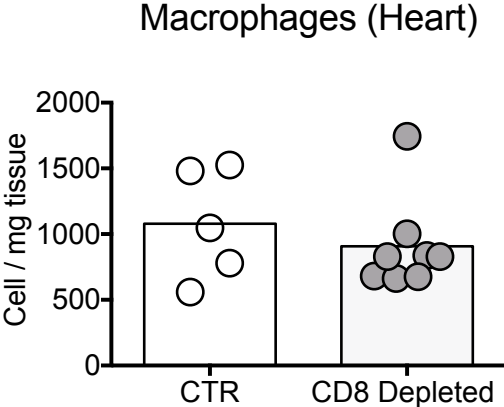

**Supplementary Fig.20. The CD8 T cell depleting antibody had no impact on macrophage content in infarcted hearts.** Cell suspensions from infarcted hearts of control (White) or CD8 depleted (Grey) C57BL/6J mice were stained and analyzed by flow cytometry 5 days after MI. Macrophages were identified as CD45<sup>+</sup>CD11b<sup>+</sup>F4/80<sup>+</sup> cells (CTR n=5 and CD8 Depleted n=8).

# Supplementary Fig. 21

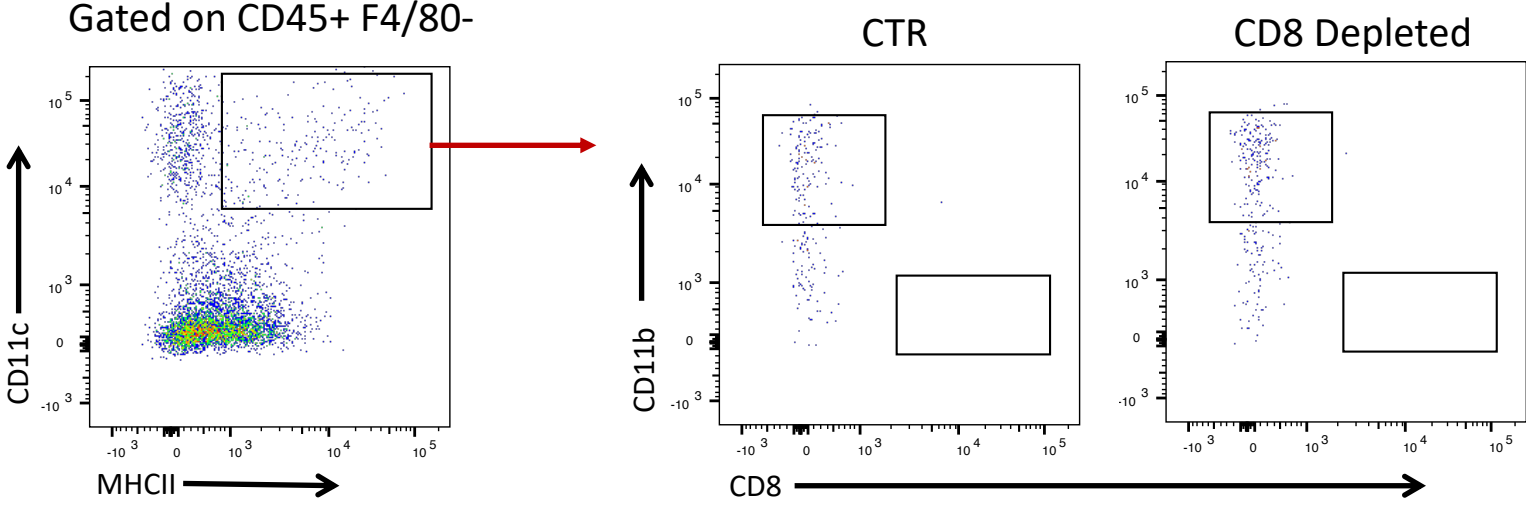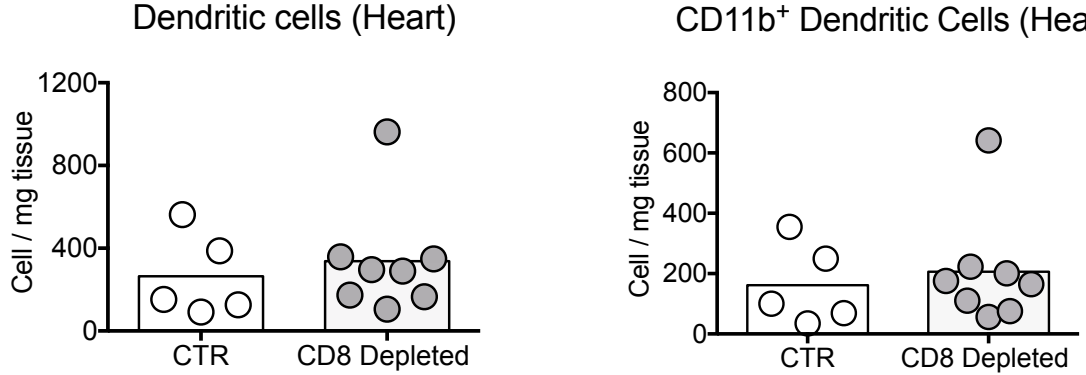

**Supplementary Fig.21. The CD8 T cell depleting antibody had no impact on dendritic cell content in infarcted hearts.** Cell suspensions from infarcted hearts of control (White) or CD8 depleted (Grey) C57BL/6J mice were stained and analyzed by flow cytometry 5 days after MI. Dendritic cells were identified as CD45+F4/80-CD11c+MHCII+ cells (CTR n=5 and CD8 Depleted n=8).

TUNEL/DAPI/Granzyme B

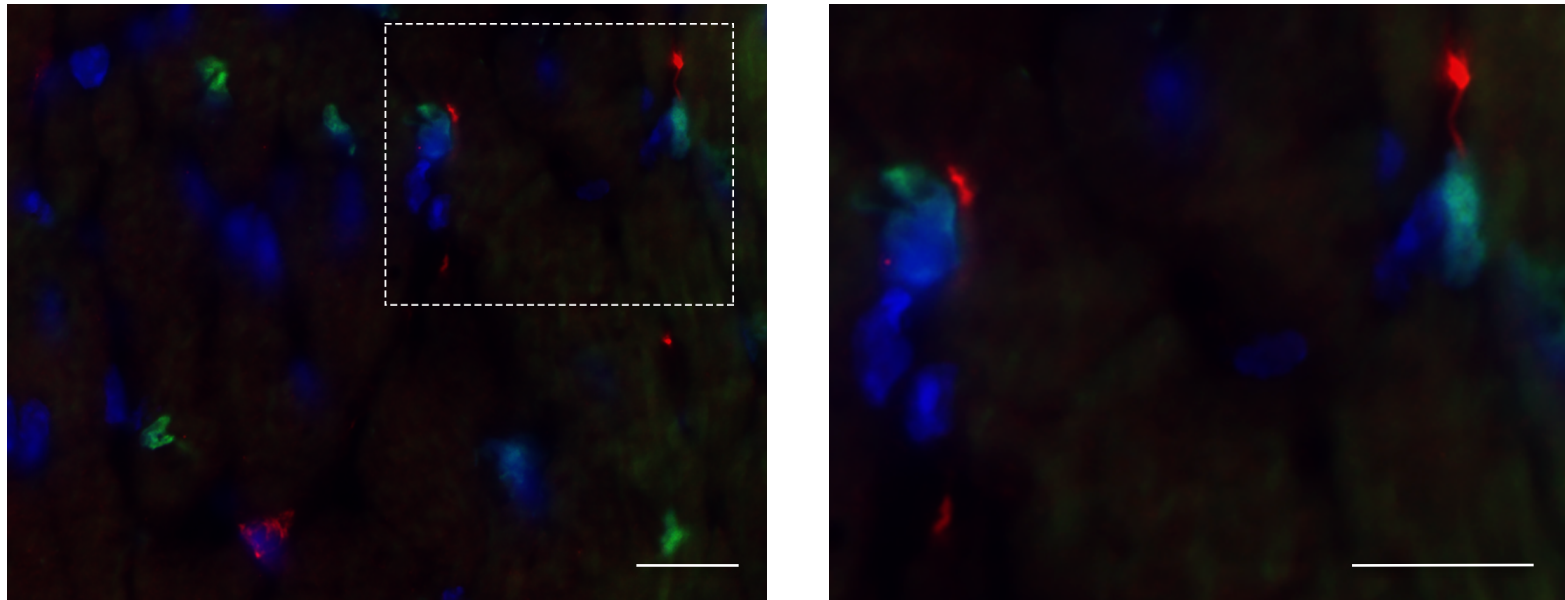

**Supplementary Fig.22. Granzyme B colocalizes with apoptotic cells in the infarcted hearts.** Granzyme B immunostaining (Red) and TUNEL staining (Green) in the infarcted heart of WT C57BL/6J mice at day 3 after MI. Nuclei were stained using DAPI (Blue). Scale bar 20  $\mu$ m.

TUNEL/DAPI/TROPONIN T/WGA

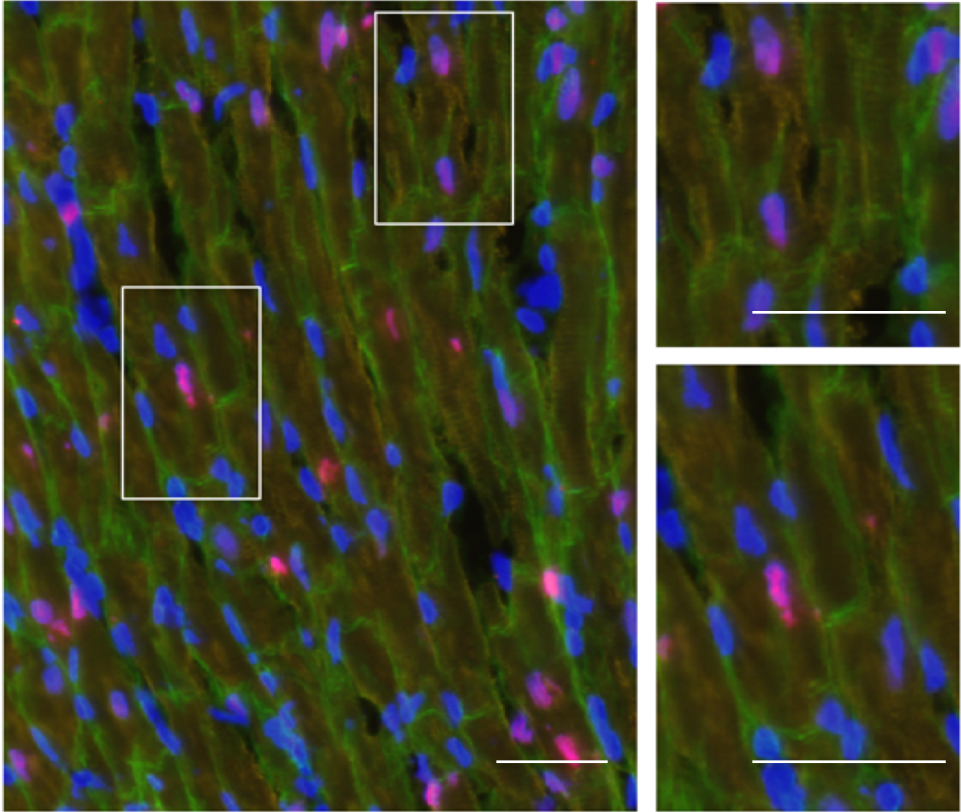

**Supplementary Fig.23. Characterization of TUNEL+ cells in ischemic heart tissue.** Immunofluorescent staining at day 3 showed that apoptotic cardiomyocytes in ischemic heart tissue. TUNEL (Pink), Troponin T (Brown), Plasma membrane (WGA, Green), and Nuclei (DAPI, Blue). Scale bar 20  $\mu$ m.



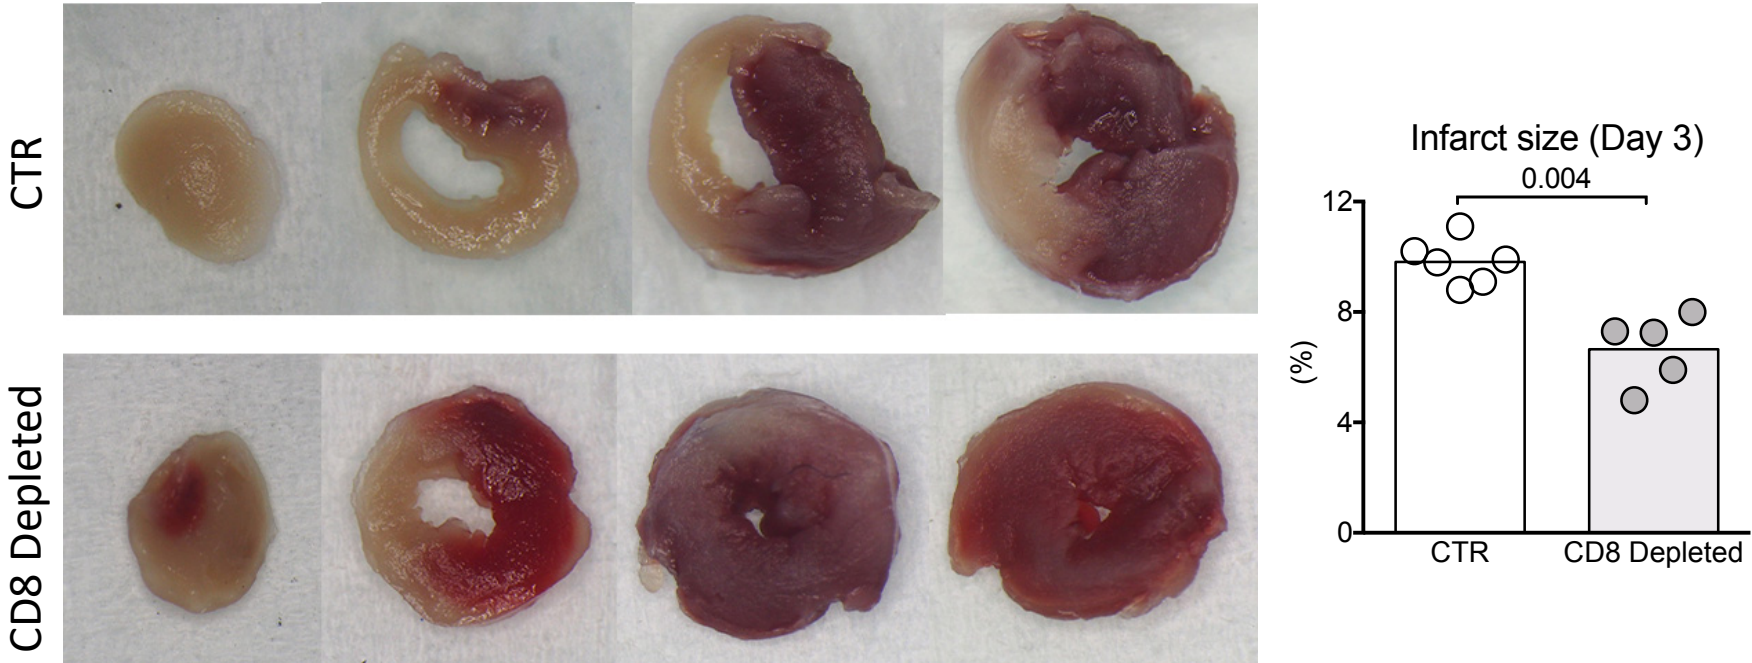

**Supplementary Fig.24. The CD8 T cell depleting antibody reduces infarct size at day 3.** (a) Representative photomicrographs and quantitative analysis of infarct size evaluation using TriphenylTetrazolium Chloride (TTC) staining, in the 2 groups of mice at day 3 after MI. CTR (White) and CD8 depleted (Grey) (CTR n=6, CD8 Depleted n=5). P values were calculated using two-tailed Mann-Whitney test.

Supplementary Fig. 25

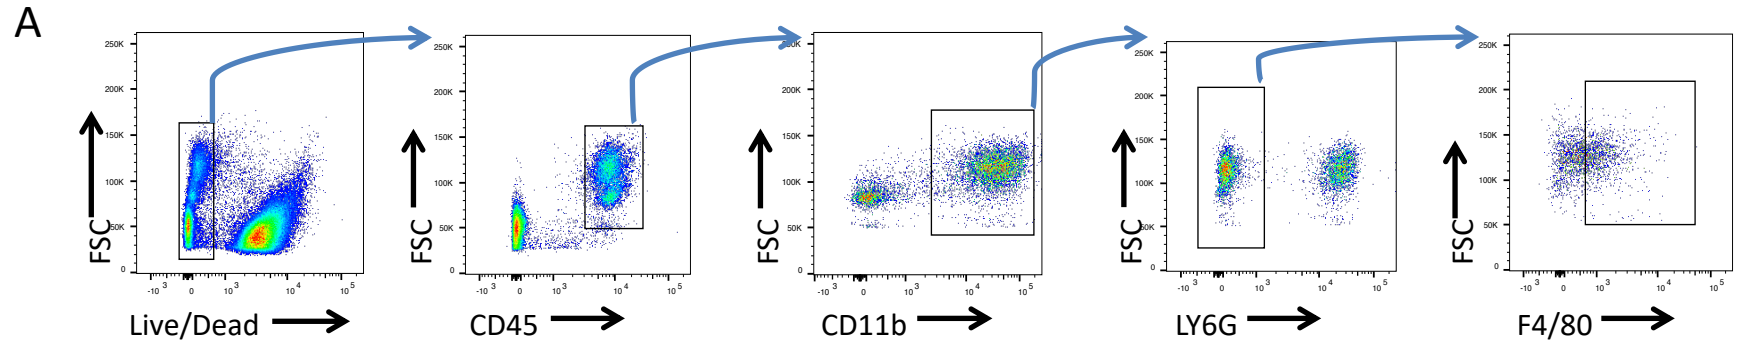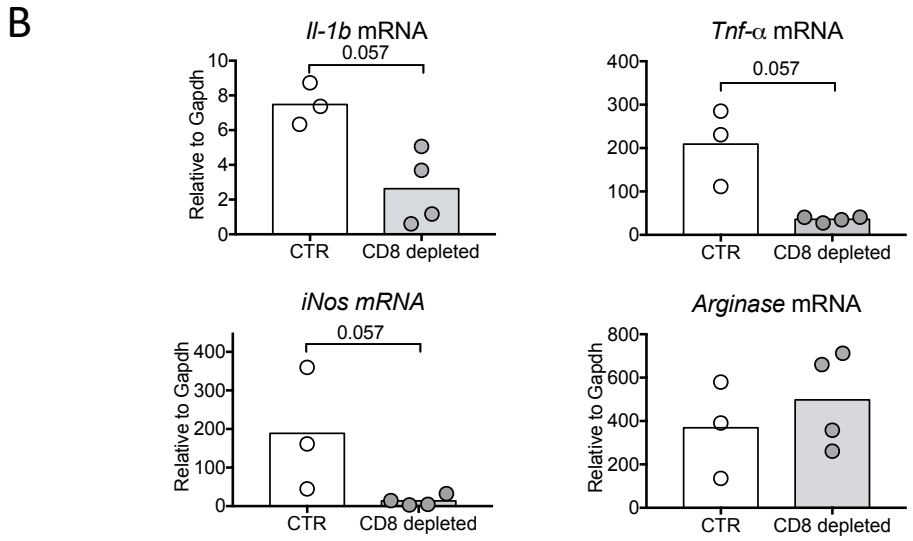

**Supplementary Fig.25. The CD8+ T cell depleting antibody promotes a phenotypic switch of tissue macrophages toward a less inflammatory profile. (a)** At Day 3 after MI, heart tissue macrophages defined as CD45+CD11B+Ly6G-F4/80+ cells were cell sorted and **(b)** *Il-1 $\beta$* , *Tnf- $\alpha$*  and *iNOS* mRNA levels were measured by qPCR, CTR group (white, n=3) and CD8 depleted (Grey, n=4). P values were calculated using two-tailed Mann-Whitney test.

Supplementary Fig. 26

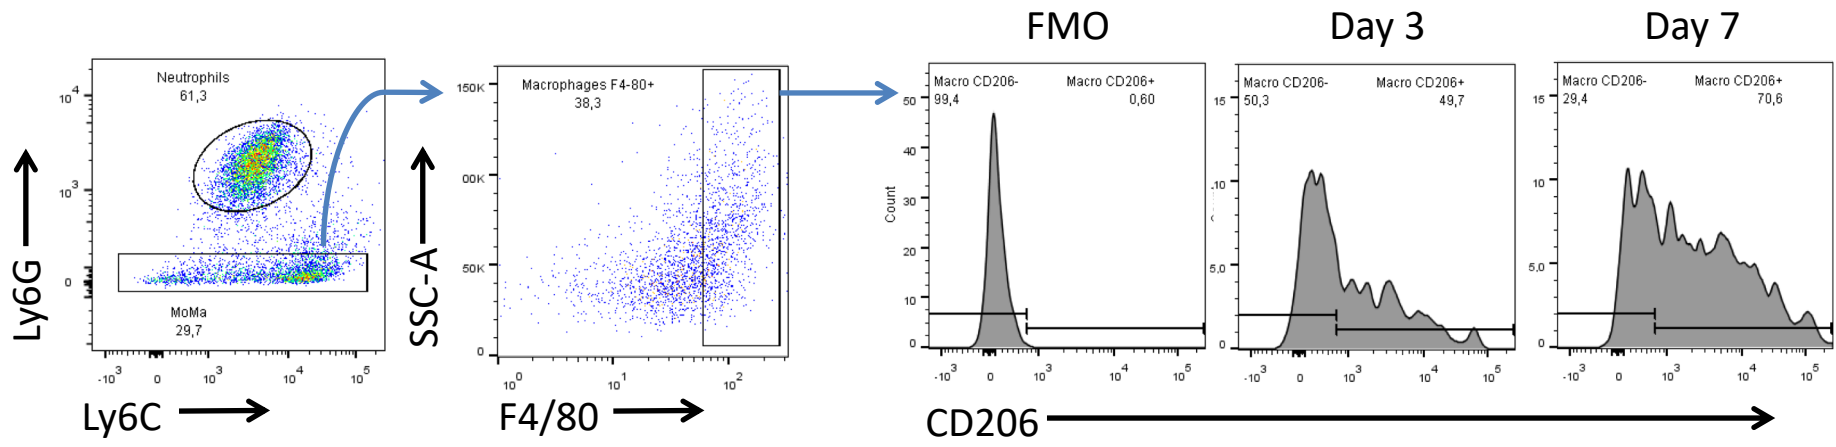

M2 macrophages (Heart)

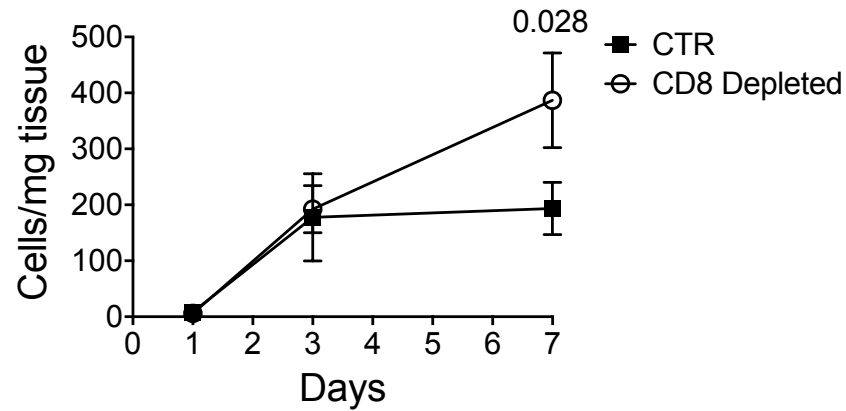

**Supplementary Fig.26. The CD8+ T cell depleting antibody promotes a macrophage phenotype associated with alternative activation.** Cell suspensions from infarcted hearts of control (Black box) or CD8 depleted (White circle) C57BL/6J mice were stained and analyzed by flow cytometry at different time points after MI. “Alternatively-activated” macrophages were identified as CD45+CD11b+Ly6G<sup>-</sup> Ly6C+F4/80+CD206+. Data are representative of 6 mice per group at each time point. Mean values ± SEM are shown. P values were calculated using two-tailed Mann-Whitney test at each time point.

Supplementary Fig. 27

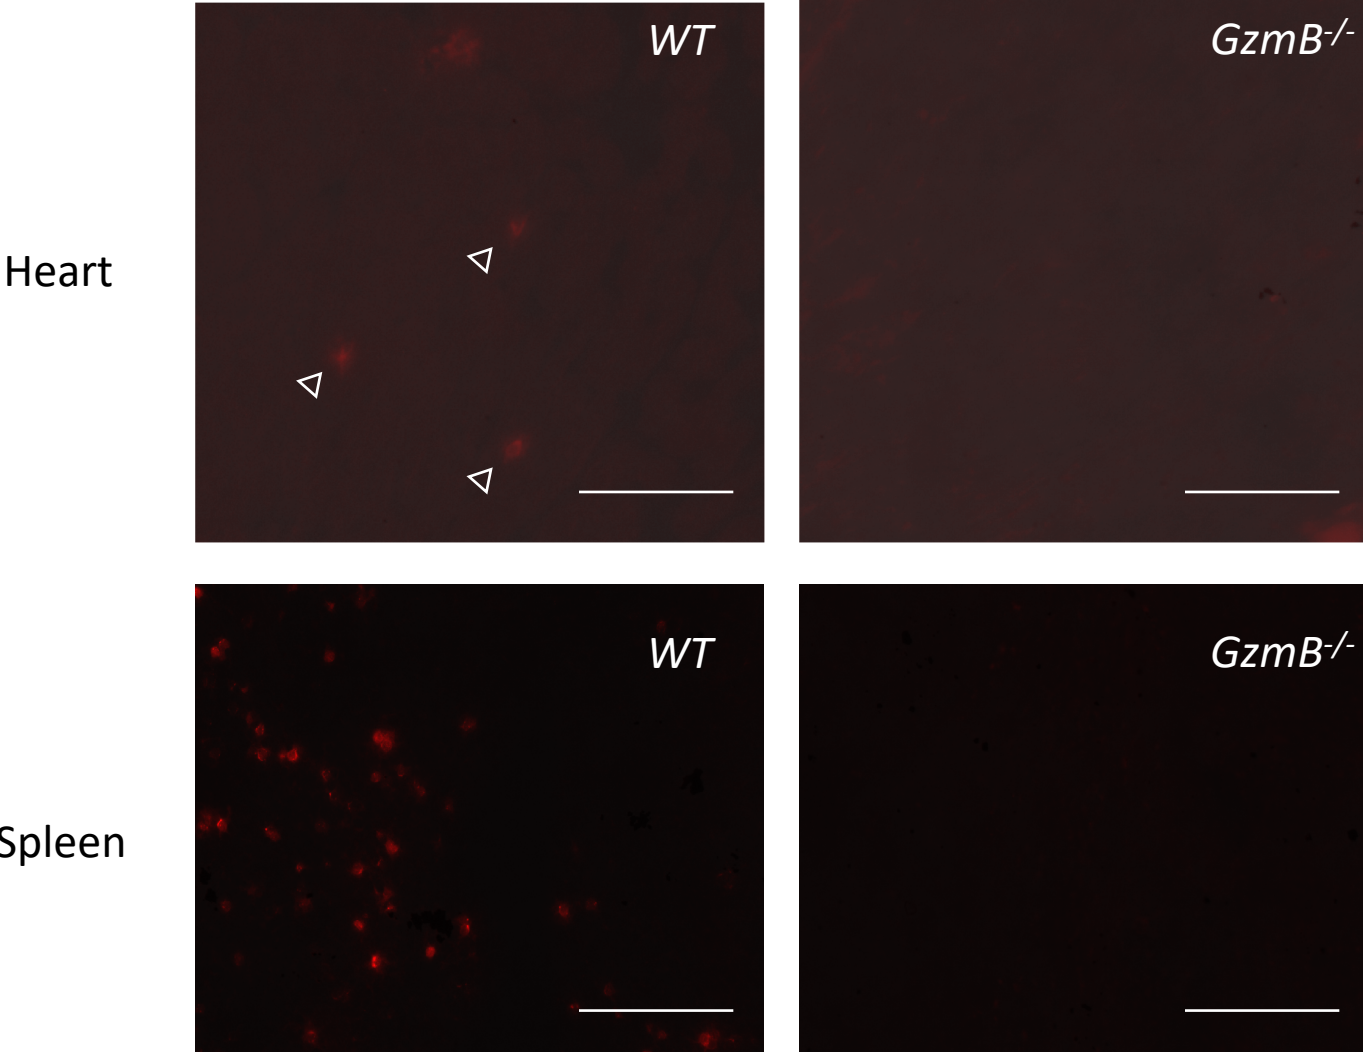

**Supplementary Fig.27. Granzyme B is not expressed in the infarcted hearts of *GzmB*<sup>-/-</sup> mice.** Granzyme B immunostaining (Red) in the infarcted heart (Upper panels) and the spleen (Lower panels) of WT C57BL/6J and *GzmB*<sup>-/-</sup> mice at day 3 after MI. Scale bar 50  $\mu$ m.

Supplementary Fig. 28

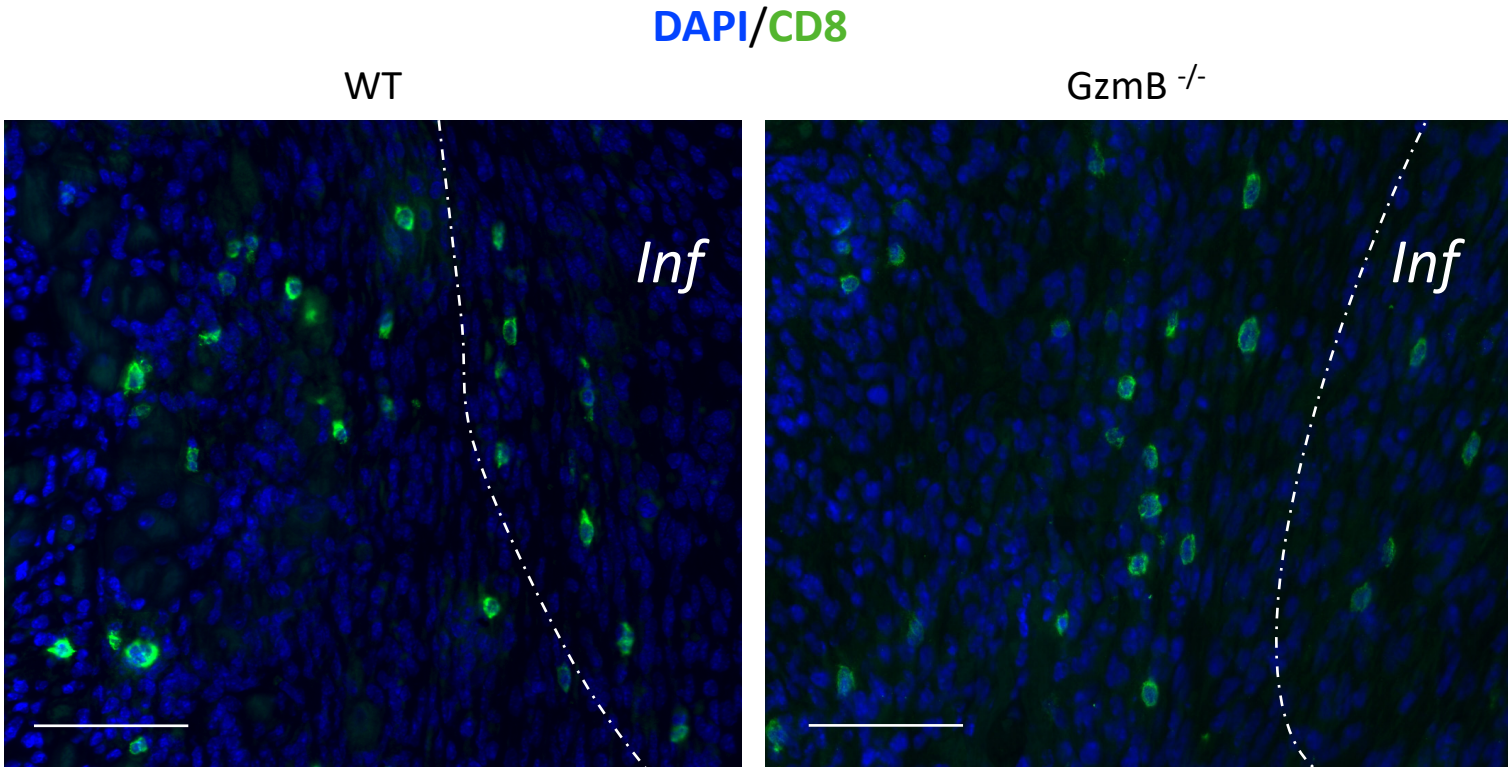

**Supplementary Fig.28. Granzyme B deficient CD8<sup>+</sup> T cells infiltrate ischemic heart.** Representative examples of CD8<sup>+</sup> T cell infiltration (green) in the heart of C57BL/6J mice or *GzmB*<sup>-/-</sup> mice at day 3 after MI. *Inf* for infarct area. Scale bar 50 μm.

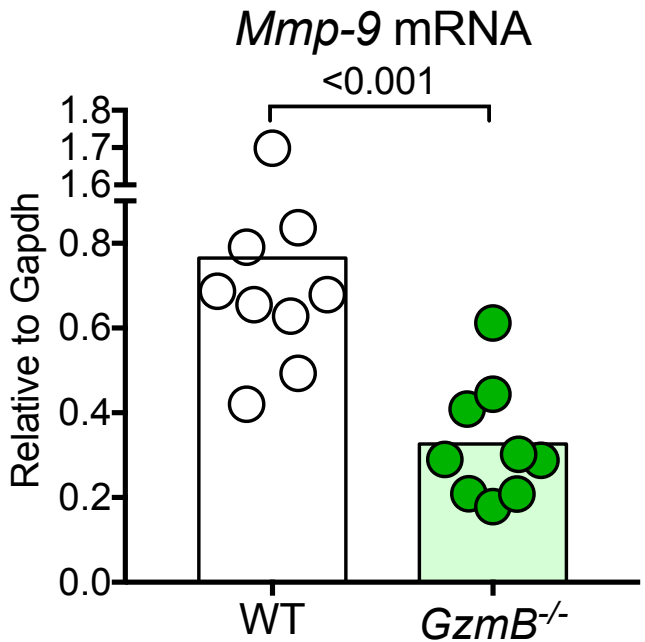

**Supplementary Fig.29. Decreased *Mmp9* in the infarcted hearts of *GzmB*<sup>-/-</sup> mice.** *Mmp9* mRNA levels measured by qPCR in infarcted heart at Day 3 after MI, (n=9/group). P values were calculated using two-tailed Mann-Whitney test.

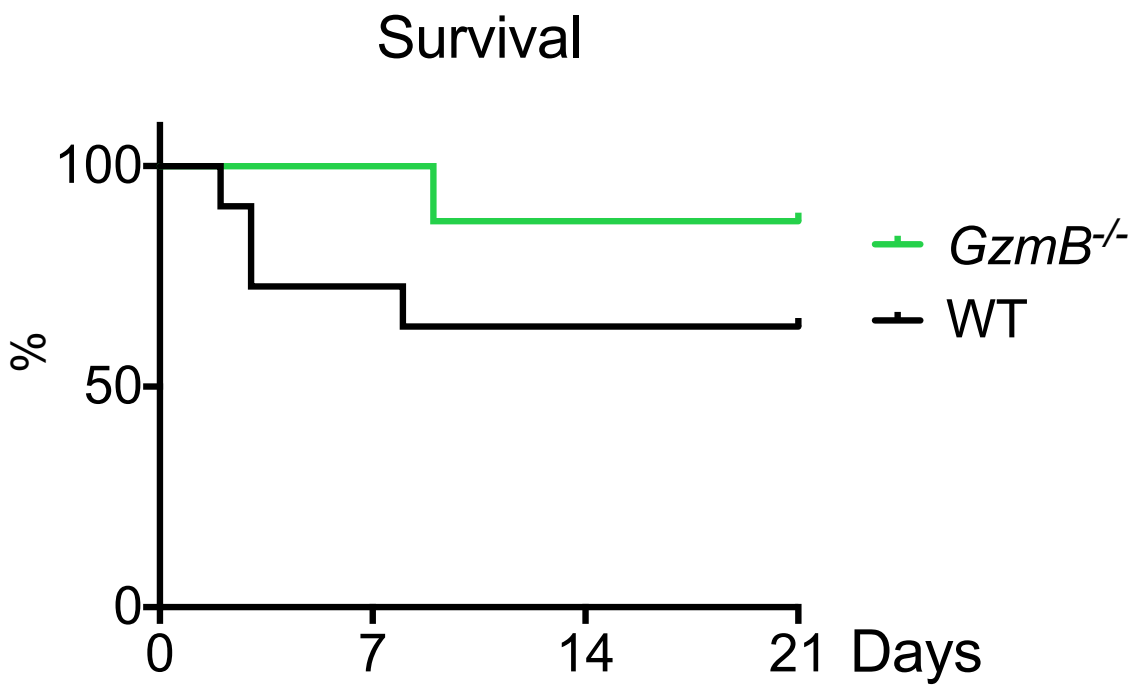

**Supplementary Fig.30. Granzyme B deficiency trends to reduce MI-related mortality.** Survival curves following acute MI (WT n=11 and *GzmB*<sup>-/-</sup> n=9).

Supplementary Fig. 31

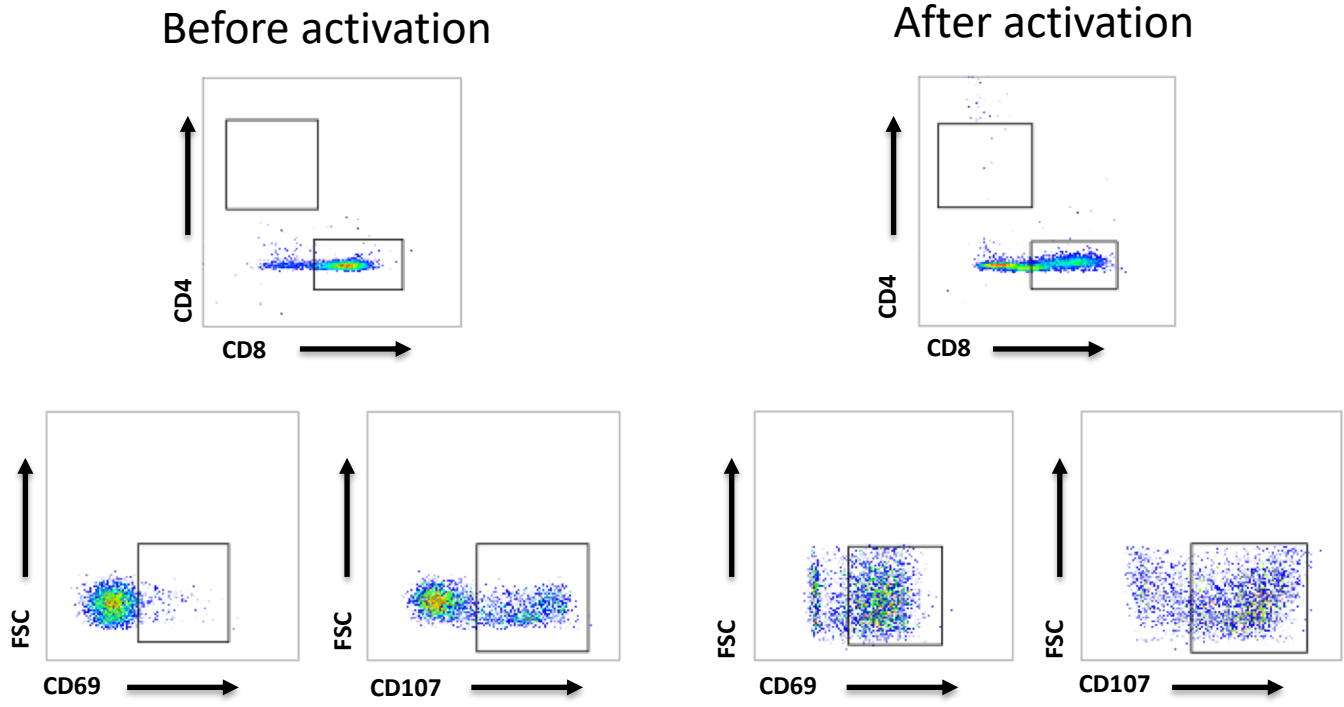

**Supplementary Fig.31. Validation of CD8<sup>+</sup> T cell activation *in vitro*.** Flow cytometry characterization of purified splenic CD8<sup>+</sup> T cells before and after *in vitro* activation.



Supplementary Fig. 32

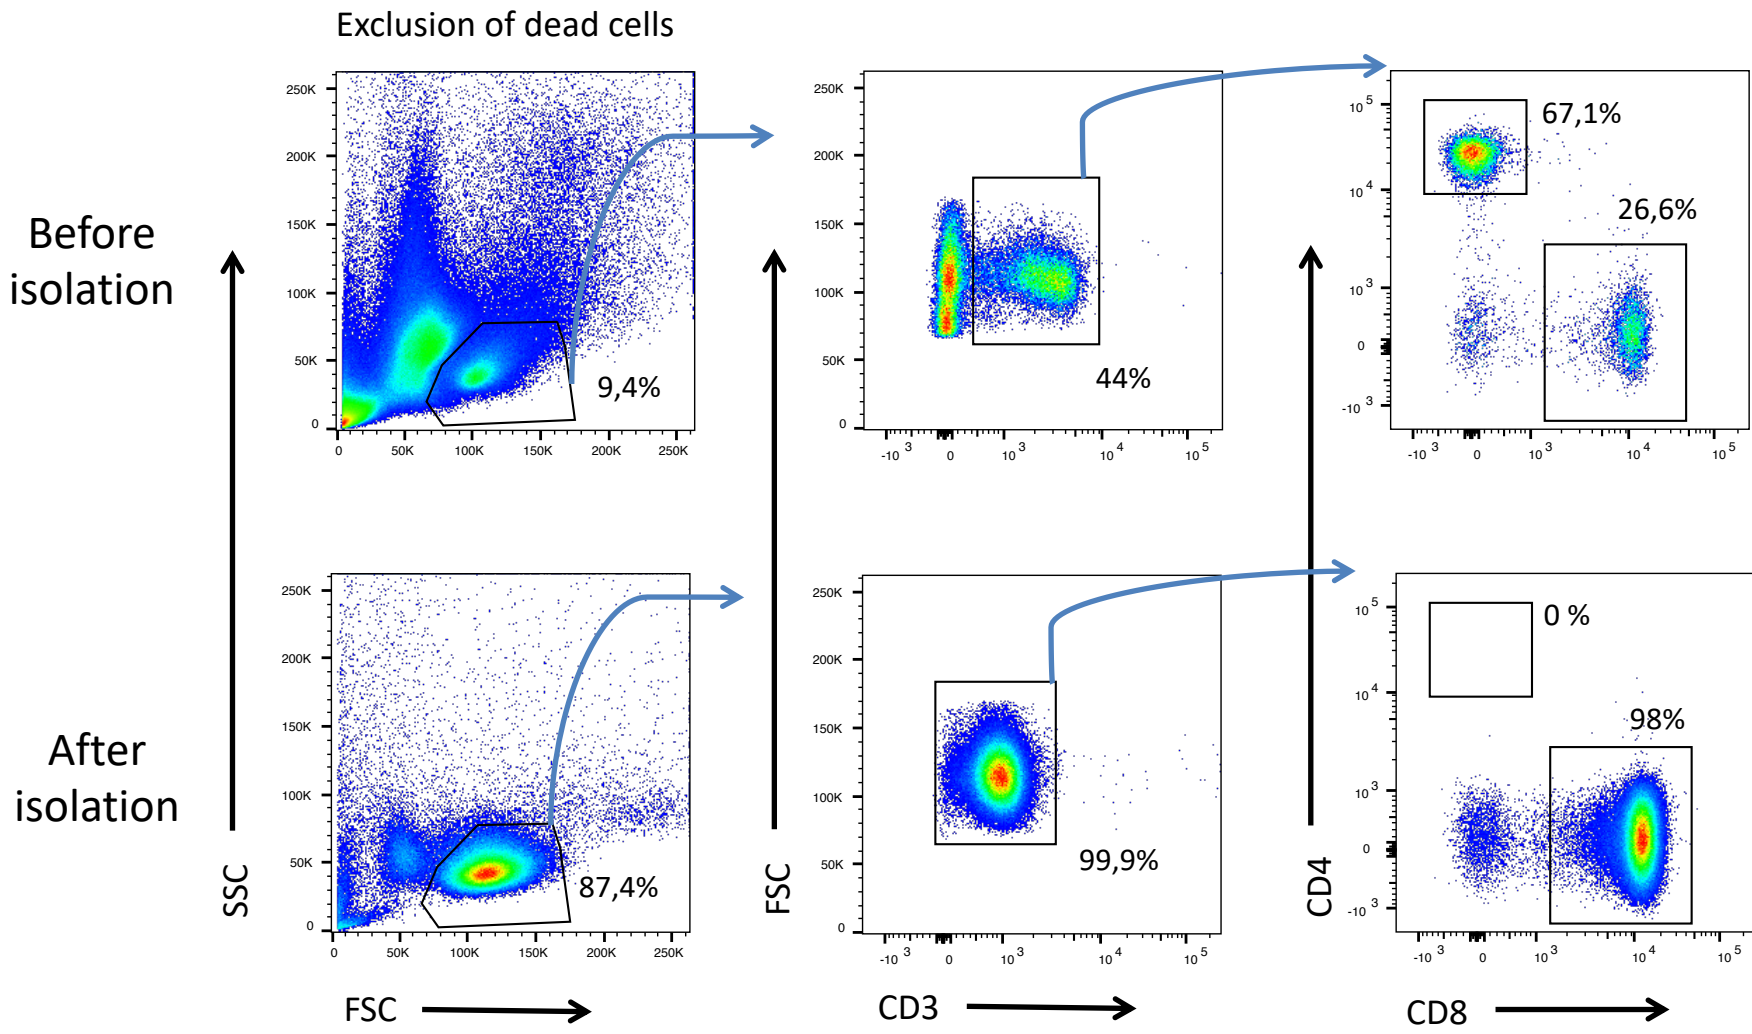

**Supplementary Fig.32. CD8<sup>+</sup> T cell purity after isolation.** Representative examples of CD3<sup>+</sup>CD8<sup>+</sup> T cells before and after purification, using the CD8 cell isolation kit (Miltenyi Biotec) according to manufacturer's instructions.

Supplementary Fig. 33

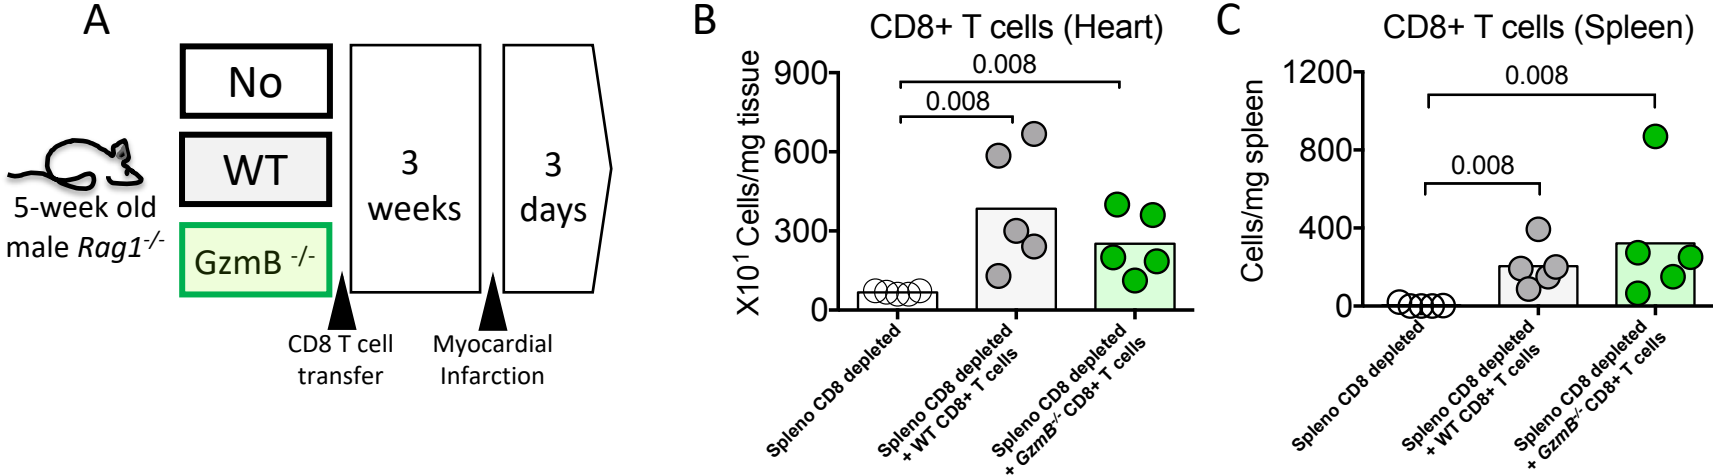

**Supplementary Fig.33. Reconstitution of CD8<sup>+</sup> T cell pool in resupplemented *Rag1*<sup>-/-</sup> mice.** (a) Experimental design of *Rag1*<sup>-/-</sup> mice injected with either CD8-depleted splenocytes (White) or CD8-depleted splenocytes re-supplemented with wild-type (Grey) or *GzmB*<sup>-/-</sup> (Green) CD8<sup>+</sup> T cells, 3 weeks before MI. (b) Cell suspensions from infarcted hearts of reconstituted *Rag1*<sup>-/-</sup> mice were stained and analyzed by flow cytometry at day 3 after MI. CD8<sup>+</sup> T cells in the heart were identified as CD45<sup>+</sup>CD3<sup>+</sup>CD8<sup>+</sup>. (c) Cell suspensions from spleen of reconstituted *Rag1*<sup>-/-</sup> mice were stained and analyzed by flow cytometry at day 3 after MI. CD8<sup>+</sup> T cells in the spleen were identified as CD45<sup>+</sup> CD3<sup>+</sup> CD8<sup>+</sup>. Data are representative of 5 mice per group at each time point. P values were calculated using two-tailed Kruskal-Wallis test.

# Supplementary Fig. 34

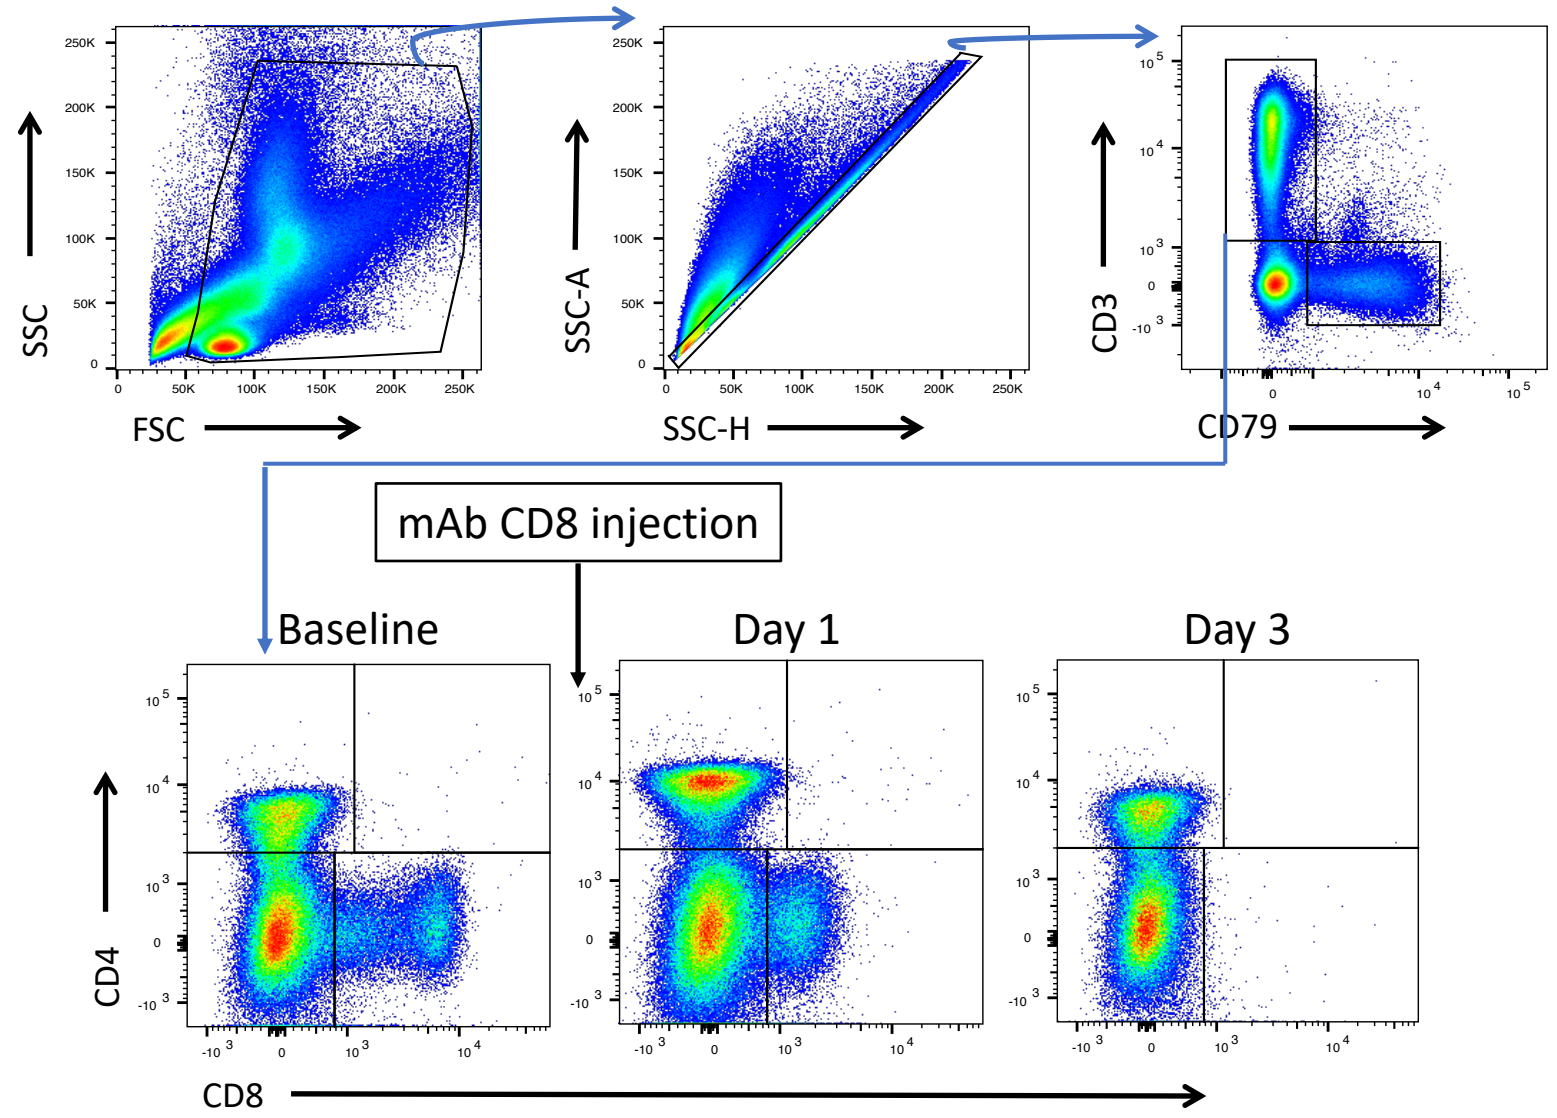

**Supplementary Fig.34. Mouse anti-swine mAb CD8 induced delayed CD8 depletion.** Blood CD8<sup>+</sup> T cells were quantified in the blood at different time points after mAb CD8 injection (15mg/kg, IV) in female pig. CD8<sup>+</sup> T cells were defined as CD79-CD3<sup>+</sup>CD4<sup>-</sup>CD8<sup>+</sup>. Cells.

Supplementary Fig. 35

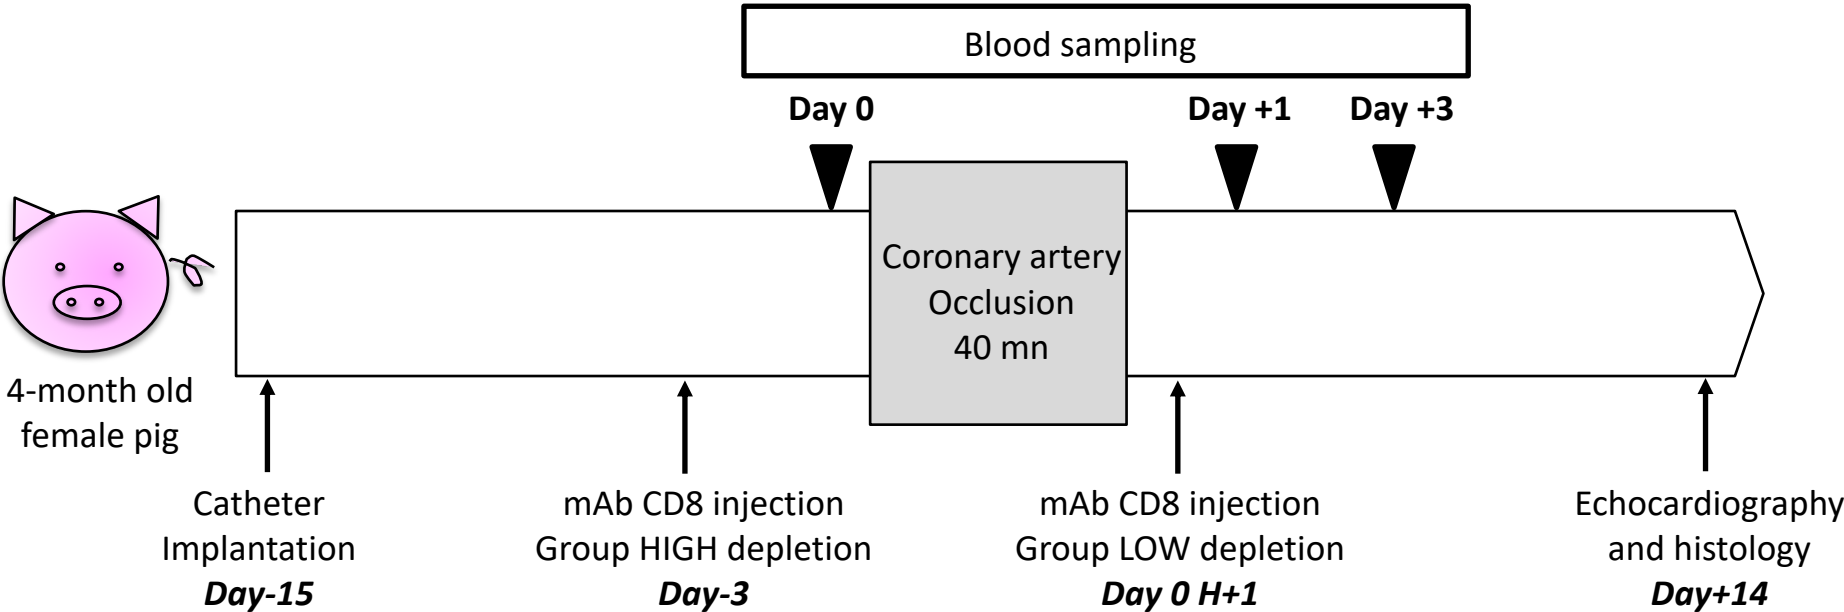

Supplementary Fig.35. Experimental protocol of CD8 depletion in female pigs in the context of myocardial ischemia-reperfusion.

# Supplementary Fig. 36

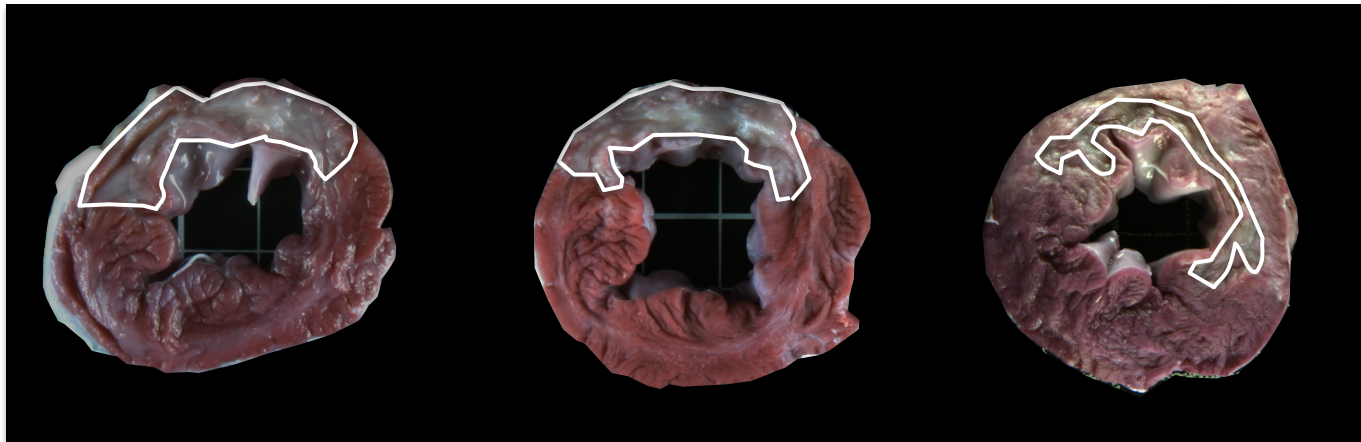

Control

Low CD8  
depletion

High CD8  
depletion

**Supplementary Fig.36. Representative pictures of infarct size at Day 14 in Control, Low and High CD8-depleted groups.**

# Supplementary Fig. 37

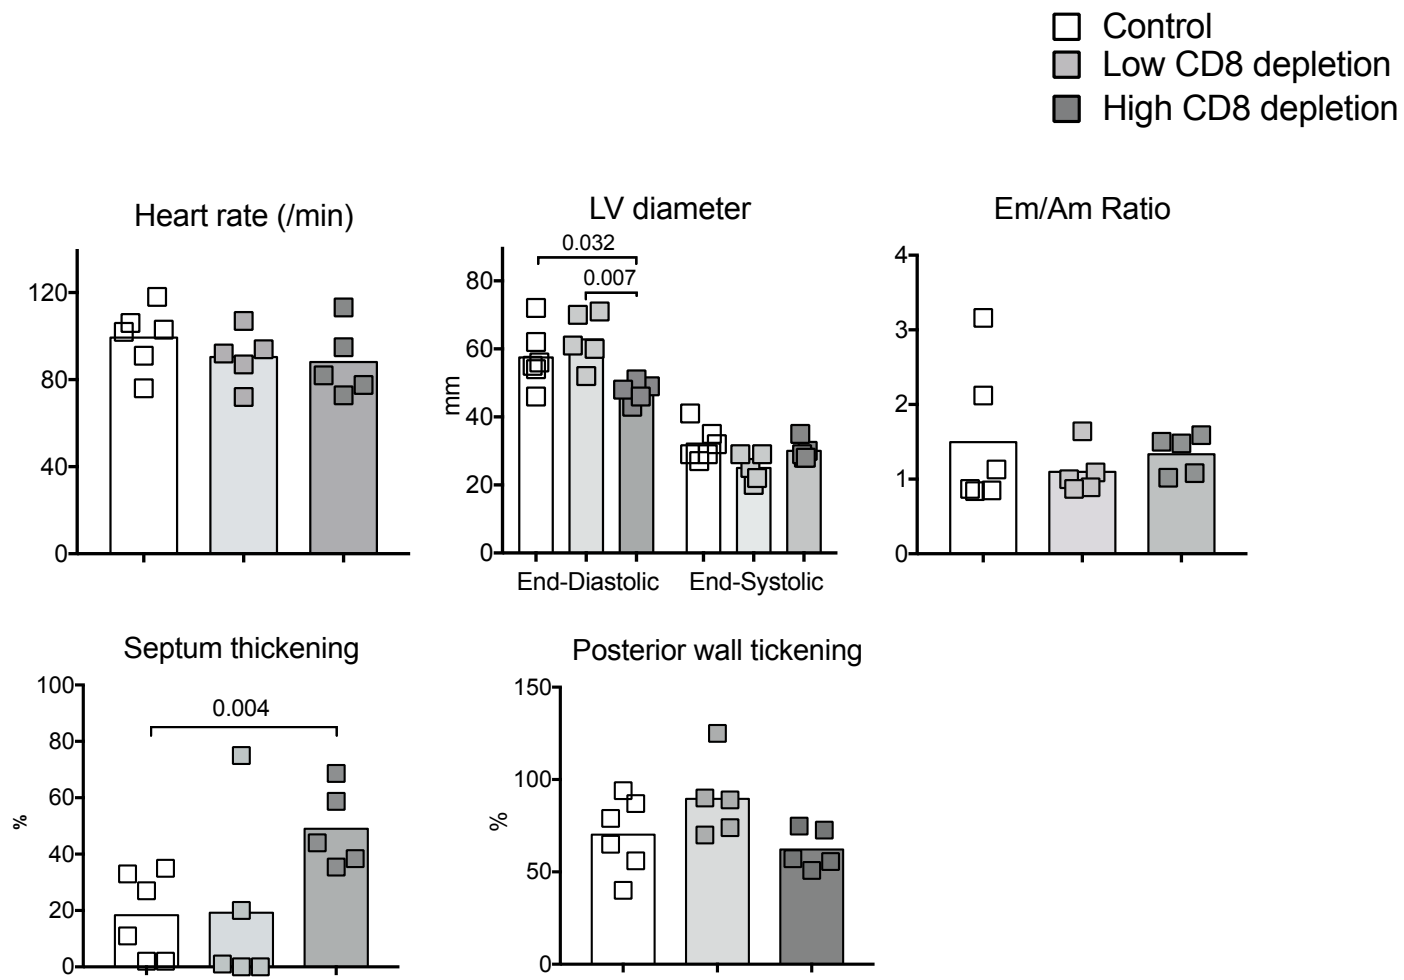

**Supplementary Fig.37. Echocardiography parameters at Day 14 in Control (PBS), Low and High CD8-depleted groups** (Control n=6, Low depletion n=5 and high depletion n=5). P values were calculated using two-tailed Kruskal-Wallis test. LV, Left ventricle

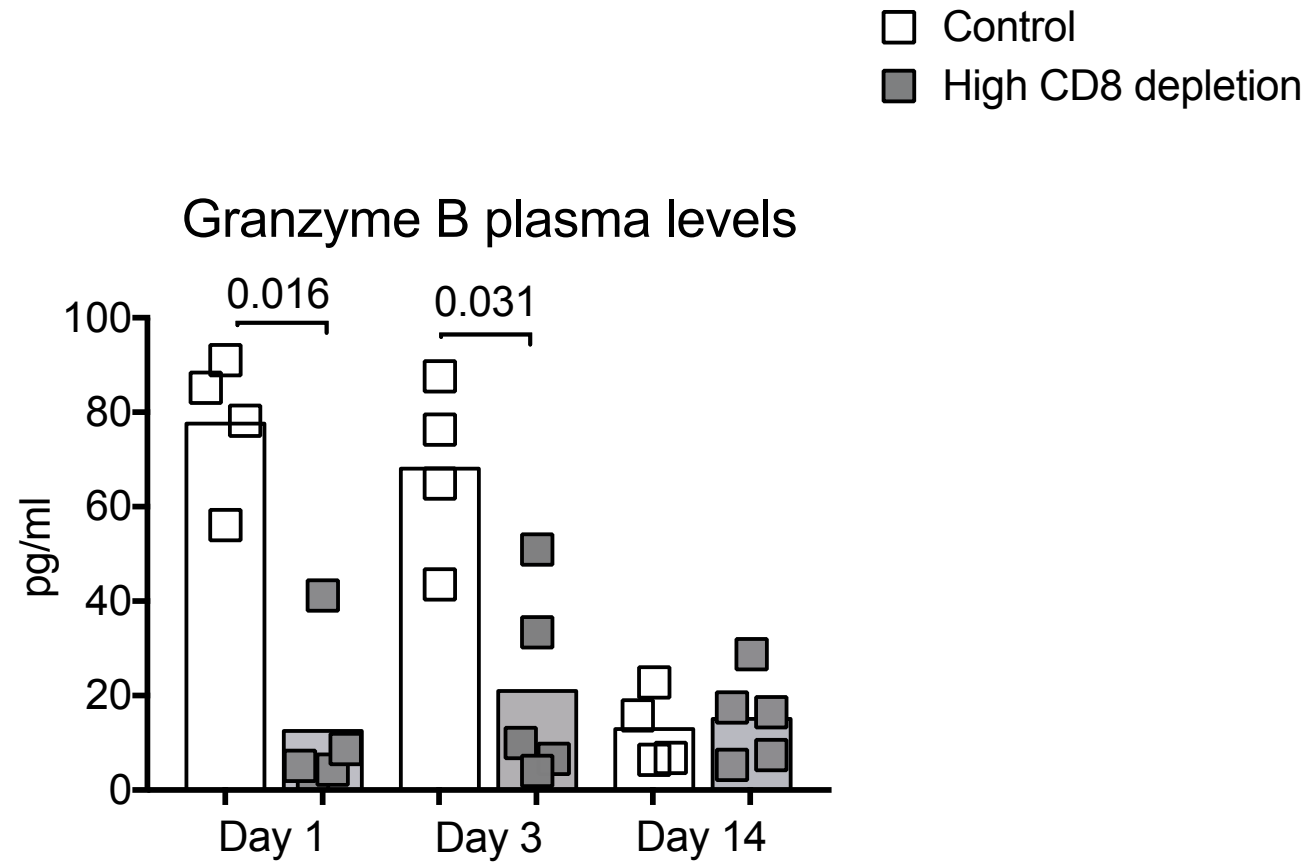

**Supplementary Fig.38. Plasma Granzyme B levels in pigs.** Plasma Granzyme B levels was measured at Day 1, 3 and 14 after heart ischemia/reperfusion in control (White box, N=4) and CD8 depleted (High depletion, Dark box, N=5) by ELISA. P values were calculated using two-tailed Mann-Whitney test at each timepoint.

| <b>Parameters</b>                                  |            |
|----------------------------------------------------|------------|
| Myocardial biopsy, n                               | 17         |
| Time between myocardial infarction and LVAD (days) | 14 (5;21)  |
| Male Sex                                           | 88 %       |
| Age, years                                         | 55 (52;61) |
| Hypertension                                       | 41%        |
| Hypercholesterolemia                               | 41%        |
| Diabetes mellitus                                  | 23%        |
| Current smokers                                    | 59%        |
| Chronic kidney disease                             | 12%        |
| STEMI                                              | 88%        |
| No STEMI                                           | 12%        |
| PCI                                                | 70%        |
| Thrombolyse                                        | 0%         |
| Coronary artery bypass surgery                     | 12%        |
| Aspirin                                            | 100%       |
| Heparin or Low Molecular Weight Heparin            | 100%       |
| Cardiogenic shock                                  | 100%       |
| Heart transplantation after LVAD                   | 41%        |

Supplementary Table 1: characteristics of included patients in histopathological study. LVAD, left ventricle assist device; PCI, Percutaneous coronary intervention; STEMI, ST Elevation Myocardial Infarction. Data are expressed as median (1<sup>st</sup>IQR, 3<sup>rd</sup>IQR) or percentage.



|                                              | < 8.9 pg/mL<br>(N=523) | ≥ 8.9 pg/mL<br>(N=523) | p†          |
|----------------------------------------------|------------------------|------------------------|-------------|
| <b>Demographic and risk factors</b>          |                        |                        |             |
| Male Sex, No (%)                             | 402 (76.9)             | 388 (74.2)             | 0.31        |
| Age, yr ‡                                    | 63.0 ± 13.4            | 64.4 ± 14.0            | 0.11        |
| Hypertension, No (%)                         | 266 (50.9)             | 276 (52.8)             | 0.54        |
| Hypercholesterolemia, No (%)                 | 231 (44.2)             | 229 (43.8)             | 0.90        |
| Diabetes mellitus, No (%)                    | 111 (21.2)             | 98 (18.7)              | 0.31        |
| Family history of CAD, No (%)                | 152 (29.1)             | 138 (26.4)             | 0.33        |
| Current smokers, No (%)                      | 222 (42.4)             | 191 (36.5)             | <b>0.05</b> |
| Prior myocardial infarction, No (%)          | 69 (13.2)              | 77 (14.7)              | 0.48        |
| Prior PCI or CABG, No (%)                    | 73 (14.0)              | 82 (15.7)              | 0.43        |
| Prior stroke or TIA, No (%)                  | 18 (3.4)               | 22 (4.2)               | 0.52        |
| Prior heart failure, No (%)                  | 11 (2.1)               | 18 (3.4)               | 0.19        |
| Chronic kidney disease, No (%)               | 22 (4.2)               | 18 (3.4)               | 0.52        |
| <b>Clinical presentation</b>                 |                        |                        |             |
| Body mass index, kg/m <sup>2</sup> ‡         | 26.8 ± 4.6             | 26.8 ± 4.3             | 0.94        |
| Systolic blood pressure at admission, mmHg ‡ | 144.8 ± 28.7           | 146.7 ± 27.0           | 0.26        |
| Heart rate at admission, beat/min ‡          | 79.2 ± 20.4            | 77.6 ± 18.4            | 0.18        |
| STEMI, No (%)                                | 297 (56.8)             | 269 (51.4)             | 0.08        |
| STEMI and/or revascularisation, No (%)       |                        |                        | 0.22        |
| No STEMI                                     | 226 (43.2)             | 254 (48.6)             |             |
| STEMI alone                                  | 63 (12.0)              | 55 (10.5)              |             |
| STEMI and revascularisation                  | 234 (44.7)             | 214 (40.9)             |             |
| Killip Max ≥2, No (%)                        | 86 (16.4)              | 99 (18.9)              | 0.29        |
| GRACE score ‡                                | 136.8 ± 34.3           | 137.5 ± 34.6           | 0.76        |
| Left ventricular ejection fraction, % ‡      | 51.6 ± 10.5            | 52.5 ± 11.2            | 0.17        |
| <b>Baseline biological exams</b>             |                        |                        |             |
| CRP, mg/L*                                   | 5.0 [3.0 ; 9.8]        | 5.0 [3.0 ; 10.7]       | 0.78        |
| <b>In-hospital Management</b>                |                        |                        |             |
| PCI, No (%)                                  | 420 (80.3)             | 399 (76.3)             | 0.12        |
| Thrombolyse, No (%)                          | 45 (8.6)               | 41 (7.8)               | 0.65        |
| Coronary artery bypass surgery, No (%)       | 13 (2.5)               | 27 (5.2)               | <b>0.02</b> |
| Statins, No (%)                              | 475 (90.8)             | 464 (88.7)             | 0.26        |
| Beta-blockers, No (%)                        | 431 (82.4)             | 432 (82.6)             | 0.94        |
| Calcium channel blockers, No (%)             | 125 (23.9)             | 132 (25.2)             | 0.62        |
| ACE inhibitors or ARB, No (%)                | 226 (43.2)             | 244 (46.7)             | 0.26        |
| Nitrated derivatives, No (%)                 | 251 (48.0)             | 256 (48.9)             | 0.76        |
| Aspirin, No (%)                              | 502 (96.0)             | 513 (98.1)             | <b>0.04</b> |
| Clopidogrel, No (%)                          | 403 (77.1)             | 410 (78.4)             | 0.60        |
| Heparin, No (%)                              | 231 (44.2)             | 235 (44.9)             | 0.80        |
| Low Molecular Weight Heparin, No (%)         | 293 (56.0)             | 306 (58.5)             | 0.42        |
| Diuretics, No (%)                            | 137 (26.2)             | 157 (30.0)             | 0.17        |

|                                                                                                                                                                             |            |            |               |
|-----------------------------------------------------------------------------------------------------------------------------------------------------------------------------|------------|------------|---------------|
| Glycoprotein IIb/IIIa inhibitors, No (%)                                                                                                                                    | 231 (44.2) | 175 (33.5) | <b>0.0004</b> |
| Digitalis glycosides, No (%)                                                                                                                                                | 3 (0.6)    | 4 (0.8)    | 1             |
| <b>†p is given by unpaired two-sided Student t or Wilcoxon rank-sum (continuous variables) and exact Pearson X<sup>2</sup> or Fisher exact test (categorical variables)</b> |            |            |               |
| <b>‡ Mean ± sd, *Median, Q1, Q3</b>                                                                                                                                         |            |            |               |

Supplementary Table 2: Characteristics of included patients according to baseline plasma Granzyme B level. CAD, Coronary Artery Disease; PCI, Percutaneous coronary intervention; CABG, Coronary By-Pass Graft; TIA, Transient ischemic attack; STEMI, ST Elevation Myocardial Infarction.

### Supplementary Table 3

| Characteristics                       | HR    | CI 95%           | P-value |
|---------------------------------------|-------|------------------|---------|
| <b>Granzyme B median ≥8.9</b>         | 2.261 | (1.221 - 4.188)  | 0.0095  |
| <b>Female gender</b>                  | 0.879 | (0.463 - 1.671)  | 0.6943  |
| <b>Age</b>                            | 1.037 | (1.002 - 1.073)  | 0.0366  |
| <b>Hypertension</b>                   | 0.968 | (0.492 - 1.905)  | 0.9253  |
| <b>BMI ≥30</b>                        | 0.835 | (0.395 - 1.766)  | 0.6370  |
| <b>Current smokers</b>                | 0.953 | (0.402 - 2.255)  | 0.9120  |
| <b>Hypercholesterolemia</b>           | 1.170 | (0.665 - 2.056)  | 0.5859  |
| <b>Diabetes mellitus</b>              | 1.631 | (0.873 - 3.048)  | 0.1249  |
| <b>STEMI and/or revascularisation</b> |       |                  | 0.0646  |
| STEMI + revascularisation             | 0.464 | (0.207 - 1.043)  |         |
| STEMI without revascularisation       | 1.490 | (0.627 - 3.542)  |         |
| No STEMI                              | 1.000 |                  |         |
| <b>Killip Max ≥2</b>                  | 1.495 | (0.773 - 2.888)  | 0.2320  |
| <b>LV ejection fraction ≥40</b>       | 1.576 | (0.821 - 3.027)  | 0.1715  |
| <b>Prior stroke or TIA</b>            | 1.535 | (0.602 - 3.913)  | 0.3691  |
| <b>Prior myocardial infarction</b>    | 0.478 | (0.217 - 1.053)  | 0.0671  |
| <b>Prior heart failure</b>            | 7.677 | (3.148 - 18.72)  | <.0001  |
| <b>Chronic kidney disease</b>         | 1.798 | (0.817 - 3.961)  | 0.1451  |
| <b>Prior cancer</b>                   | 2.173 | (1.059 - 4.46)   | 0.0343  |
| <b>Family history of CAD</b>          | 0.785 | (0.349 - 1.765)  | 0.5589  |
| <b>Statins</b>                        | 1.571 | (0.711 - 3.471)  | 0.2636  |
| <b>Beta-blockers</b>                  | 0.392 | (0.218 - 0.704)  | 0.0017  |
| <b>Diuretics</b>                      | 1.068 | (0.566 - 2.017)  | 0.8388  |
| <b>Clopidogrel</b>                    | 2.296 | (0.912 - 5.779)  | 0.0776  |
| <b>Low Molecular Weight Heparin</b>   | 0.374 | (0.195 - 0.718)  | 0.0031  |
| <b>GPIIb/IIIa inhibitors</b>          | 0.827 | (0.401 - 1.708)  | 0.6084  |
| <b>Coronary artery bypass surgery</b> | 0.572 | (0.128 - 2.55)   | 0.4639  |
| <b>CPK peak</b>                       |       |                  |         |
| CPK > 1701                            | 3.334 | (1.082 - 10.279) | 0.0360  |
| CPK ]595 ; 1701]                      | 1.318 | (0.467 - 3.718)  | 0.6021  |
| CPK ]212 ; 595]                       | 0.722 | (0.247 - 2.114)  | 0.5524  |
| CPK Missing                           | 2.935 | (1.233 - 6.987)  | 0.0150  |
| CPK ≤ 212                             | 1.000 |                  |         |

Supplemental Table 3: Multivariable logistic regression analysis of risk factors for 1-year mortality, using a multivariable Cox proportional-hazards model. HR, Hazard Ratio, BMI, Body Mass Index ; STEMI, ST Elevation Myocardial Infarction ; LV, Left Ventricle ; CAD ; Coronary Artery Disease; CPK peak value was available in 861 patients.

| Primary Antibody | Fluorochrome     | Clone        | Supplier                   | Reference  | Isotype                  |
|------------------|------------------|--------------|----------------------------|------------|--------------------------|
| CD3e             | PerCP            | 145-2C11     | BD Biosciences             | 553067     | Armenian Hamster IgG1, K |
| CD3e             | PerCP            | 145-2C11     | eBioscience                | 45-0031-82 | Armenian Hamster IgG1, K |
| CD3e             | BV421            | 145-2C11     | BD Biosciences             | 562600     | Armenian Hamster IgG1, K |
| CD3e             | PE-Cy7           | 145-2C11     | BD Biosciences             | 552774     | Armenian Hamster IgG1, K |
| CD4              | FITC             | RM4-5        | eBioscience                | 11-0042-85 | Rat IgG2a, k             |
| CD4              | PE               | RM4-5        | eBioscience                | 12-0043-82 | Rat IgG2b, k             |
| CD8a             | AF700            | 53-6.7       | BD Biosciences             | 557959     | Rat IgG2a, k             |
| CD8a             | APC              | 53-6.7       | BD Biosciences             | 553035     | Rat IgG2a, k             |
| CD45R (B220)     | V500             | RA3-6B2      | BD Biosciences             | 561226     | Rat IgG2a, k             |
| CD19             | PE               | 1D3          | eBioscience                | 12-0193-82 | Rat IgG2a, k             |
| CD19             | PE-Cy7           | 1D3          | BD Biosciences             | 552854     | Rat IgG2a, k             |
| CD107            | APC-Cy7          | 1D4B         | BioLegend                  | 121615     | Rat IgG2a, k             |
| CD69             | PE               | H1.2F3       | eBioscience                | 12-0691-83 | Armenian Hamster IgG1, K |
| CD69             | BV421            | H1.2F3       | BD Biosciences             | 562920     | Armenian Hamster IgG1, K |
| CD45             | FITC             | 30-F11       | BD Biosciences             | 553079     | Rat IgG2b, k             |
| CD45             | PerCP            | 30-F11       | BD Biosciences             | 557235     | Rat IgG2b, k             |
| CD45             | AF700            | 30-F11       | BD Biosciences             | 560510     | Rat IgG2b, k             |
| CD11b            | PE-Cy7           | M1/70        | eBioscience                | 25-0112-82 | Rat IgG2b, k             |
| CD11c            | PerCP-Cy5.5      | HL3          | BD Biosciences             | 560584     | Armenian Hamster IgG1, K |
| LY6G             | PE               | 1A8          | BD Biosciences             | 551461     | Rat IgG2a, k             |
| LY6C             | FITC             | AL-21        | BD Biosciences             | 553104     | Rat IgM, k               |
| F4/80            | APC              | A3-1         | Bio-Rad                    | MCA497APCT | Rat IgG2b, k             |
| F4/80            | PE               | BM8          | eBioscience                | 12-4801-82 | Rat IgG2a, k             |
| CD64             | BV421            | x54-5/7.1    | BioLegend                  | 139309     | Mouse IgG1, k            |
| CD44             | APC              | IM7          | eBioscience                | 17-0441-83 | Rat IgG2b, k             |
| CD206            | AF647            | C068C2       | BioLegend                  | 141712     | Rat IgG2a, k             |
| MHCII            | PerCP-eFluor 710 | M5/114.15.2  | eBioscience                | 46-5321-82 | Rat IgG2b, k             |
| CCR7             | PE-Cy7           | 4B12         | eBioscience                | 17-1971-82 | Rat IgG2a, k             |
| NK1.1            | PE-Cy7           | PK136        | eBioscience                | 25-5941-82 | Mouse IgG2a, k           |
| NK1.1            | APC              | PK136        | eBioscience                | 17-5941-82 | Mouse IgG2a, k           |
| CD172A           | No Conjugated    | -            | Monoclonal Antibody Center | PG2031     | IgG2b                    |
| MSA3 (MHCII)     | No Conjugated    | -            | Monoclonal Antibody Center | PG2006     | IgG2a                    |
| PG68A            | No Conjugated    | -            | Monoclonal Antibody Center | PG2045     | IgG1                     |
| SWC8             | No Conjugated    | MIL3         | Abcam                      | Ab34020    | IgGM                     |
| CD14             | FITC             | TUK4         | GENE TEX                   | GTX43753   | Mouse IgG2a              |
| CD163            | PE               | 2A10/11      | Abcam                      | Ab194889   | Mouse IgG1               |
| PG164A (CD8b)    | No Conjugated    | -            | Monoclonal Antibody Center | PG2020     | IgG2a                    |
| CD4              | PE-Cy7           | 74-124       | Abcam                      | Ab25408    | Mouse IgG2a              |
| CD3e             | PerCP-Cy5.5      | BB23-8E6-8C8 | BD Biosciences             | 561478     | Mouse IgG2a, k           |
| CD79a            | PE               | HM57         | BD Biosciences             | 563777     | Mouse IgG1               |

**Supplementary Table 4.** General characteristics of antibodies used for flow cytometry characterization of immune cells.

| Secondary Antibody    | Fluorochrome | Clone      | Supplier       | Reference |
|-----------------------|--------------|------------|----------------|-----------|
| Goat Anti-Mouse IgG2b | APC-Cy7      | Polyclonal | Abcam          | ab130791  |
| Rat Anti-Mouse IgG2a  | PE-Cy7       | RMG2a-62   | BioLegend      | 407114    |
| Rat Anti-Mouse IgG1   | PerCP-Cy5.5  | RMG1-1     | BioLegend      | 406612    |
| Rat Anti-mouse IgM    | APC          | Nov-41     | BD Biosciences | 550676    |

**Supplementary Table 5.** General characteristics of secondary antibodies used for flow cytometry characterization of immune cells.

| Genes         | Sequences                                                                             |
|---------------|---------------------------------------------------------------------------------------|
| Gapdh         | Forward 5'-CGTCCCGTAGACAAAATGGTGAA-3',<br>Reverse 5'-GCCGTGAGTGGAGTCATACTGGAA-CA-3';  |
| Granzyme B    | Forward 5'-GTGCGGGGGACCCAAAGACCAAAC-3',<br>Reverse: 5'-GCACGTGGAGGTGAACCATCCTTATAT-3' |
| Il1 $\beta$   | Forward 5'-GAAGAGCCCATCCTCTGTGA-3',<br>Reverse 5'-GGGTGTGCCGTCTTTCATTA-3'             |
| Il6           | Forward 5'-TGACAACCACGGCCTTCCTA-3',<br>Reverse: 5'-TCAGAATTGCCATTGCACAACCTCTT-3'      |
| Il10          | Forward 5'-ACTTCCCAGTCGGCCAGAGCCACAT-3',<br>Reverse: 5'-GATGACAGCGCCTCAGCCGCATCCT-3'  |
| Tnf- $\alpha$ | Forward 5'-GATGGGGGGCTTCCAGAACT-3',<br>Reverse 5'-GATGGGGGGCTTCCAGAACT-3'             |
| Mmp9          | Forward 5'-GCGTCATTCGCGTGGATAAGGAGT-3',<br>Reverse 5'-GTAGCCCACGTCGTCCACCTGGTT-3'     |

**Supplementary Table 6.** The primer sequences used for quantitative real-time PCR.
